# Supplementary material for: Evolution of drug resistance in an antifungal-naive chronic Candida lusitaniae infection
Source: PubMed Central journal article supplement — Proc Natl Acad Sci U S A. 2018 Nov 2;115(47):12040–5. doi: 10.1073/pnas.1807698115 (PMC6255150; doi:10.1073/pnas.1807698115), 2018-11-02
Supplement: pnas.1807698115.sapp.pdf [file pnas.1807698115.sapp.pdf]

1  
2  
3  
4  
5  
6  
7  
8  
9  
10  
11  
12  
13  
14  
15  
16  
17  
18  
19  
20  
21  
22  
23  
24

Supplementary Information for  
**Evolution of drug resistance in an antifungal-naive chronic *Candida lusitanae* infection**

Elora G. Demers, Amy R. Biermann, Sawyer Masonjones, Alex W. Crocker, Alix Ashare, Jason E. Stajich, Deborah A. Hogan  
Corresponding author: Deborah A. Hogan  
Email: [deborah.a.hogan@dartmouth.edu](mailto:deborah.a.hogan@dartmouth.edu)

**This PDF file includes:**  
Supplemental Materials and Methods  
Figs. S1 to S10  
Tables S1 to S3  
Dataset S1 and S2  
Supplemental References

## 25 **Supplemental Materials and Methods:**

### 26 **Strains and culture conditions**

27 Clinical isolates were acquired from sputum and bronchoalveolar lavage fluid  
28 samples that were plated on blood agar or CHROMagar Candida media then restreaked  
29 on YPD to obtain single isolates which were saved in 25% glycerol. All *C. lusitaniae*  
30 strains (Table S2) were streaked onto YPD (1% yeast extract, 2% peptone, 2% glucose,  
31 1.5% agar) plates every 8-10 days, from the 25% glycerol stocks stored at -80 °C, and  
32 maintained at room temperature. Overnight cultures were grown in liquid YPD at 30 °C.  
33 Cells were grown with YNBG<sub>10</sub> or YNBG<sub>100</sub> (0.67% yeast nitrogen base medium with  
34 ammonium sulfate (RPI Corp), either 10 mM or 100 mM dextrose, 1.5% agar as  
35 necessary) and RPMI-1640 (Sigma, containing L-glutamine, 165 mM MOPS, 2%  
36 glucose) as noted. CHROMagar Candida medium (CHROMagar) was prepared  
37 according to manufacturer's instructions. Colony color on CHROMagar Candida  
38 medium varied slightly by batch and incubation time, but isolates grouped together by  
39 colony color across replicate experiments. All cultures were incubated at 30 °C unless  
40 otherwise noted. *Pseudomonas aeruginosa* strains were streaked onto lysogeny broth  
41 (LB) every 8-10 days, from 25% glycerol stocks stored -80 °C, and maintained at 4 °C.  
42 Cultures were grown overnight in LB at 37 °C unless otherwise noted.

### 43 **Species identification**

44 Sequencing of the ITS1 (internal transcribed spacer 1) region amplified from total  
45 DNA isolated for a portion of the original right upper lobe sample was previously  
46 published (subject 6 in (1)). Additional ITS1 sequencing of individual isolates was  
47 performed as follows: DNA was isolated via the MasterPure yeast DNA purification kit

48 (Epicentre), ITS1 region was amplified from genomic DNA using primers ITS1\_F and  
49 ITS1\_R (2). Amplicon products were concentrated using the DNA Clean and  
50 Concentrator Kit (Zymo Research) prior to Sanger cycle sequencing by the Molecular  
51 Biology Shared Resource Core at Dartmouth. The resulting sequences were identified  
52 using NCBI BLASTn (3) to search for similar sequences among the nucleotide collection  
53 database available through NCBI which contains known ITS1 sequences. In addition to  
54 *C. lusitaniae*, minor populations of other species were identified but excluded from  
55 further analyses, including *Candida parapsilosis* among the Sp1 and LL isolates (11%  
56 and 17%, respectively) and *Candida albicans* among the Sp2 isolates (3%).

#### 57 **Whole genome sequencing and variant calling**

58 Genomic DNA was extracted from cultures grown in YPD for ~16 hours using the  
59 MasterPure yeast DNA purification kit (Epicentre). To generate the Sp1, UL and LL  
60 pools of genomic DNA, 500 ng of DNA from each isolate within the pool was combined,  
61 an aliquot of this mixture was used to create the genomic library. Genomic libraries, for  
62 single and pooled isolate DNA, were prepared using the KAPA HyperPrep Kit and  
63 sequenced using paired-end 150 bp reads on the Illumina NextSeq500 platform, to a  
64 depth of 100-150x coverage per sample. Samples sequenced include the twenty clinical  
65 isolates identified in Fig. 1C, ATCC 42720 and the Sp1, UL and LL pools.

66 The pipeline for these analyses is available in a github repository  
67 ([https://github.com/stajichlab/C\\_lusitaniae\\_popseq](https://github.com/stajichlab/C_lusitaniae_popseq)) and archived under Document  
68 Object Identifier DOI: 10.5281/zenodo.1346354. The short read sequences were aligned  
69 to the *Candida lusitaniae* ATCC 42720 (4) genome using bwa (0.7.12) (5) and stored as  
70 a sorted, aligned read BAM file with Picard (2.14.1, <http://broadinstitute.github.io/picard/>)

71 to assign read groups and mark duplicate reads (script 01\_bwa.sh). BAM files were  
72 processed to realign reads using GATK's RealignerTargetCreator (4.beta.2) and  
73 IndelRealigner following best practices of GATK (script 02\_realign.sh) (6). Each  
74 realigned bam file was processed with GATK's HaplotypeCaller (script  
75 03\_GATK\_HTC\_gatk4.sh). Results were combined using GATK's GenotypeGVCF  
76 method to produce a single variant call format (VCF) file of the identified variants (script  
77 04\_jointGVCF\_call.sh). Low quality SNPs were filtered based on mapping quality (score  
78 <40), quality by depth (<2 reads), Strand Odds Ratio (SQR>4.0), Fisher Strand Bias  
79 (>200), and Read Position Rank Sum Test (<-20) to produce list of high quality  
80 polymorphisms (script 05\_filter\_vcf.sh). Additional filtering included the removal of fixed  
81 SNPs, those that were invariant among the clinical isolates but differed from the  
82 reference, the removal of positions that were uncalled by GATK in some isolates, and  
83 positions which did not agree between a control set of samples (L17 sequenced in  
84 triplicate) (script removedfixed.py). The quality filtered VCF file containing only variants  
85 among the clinical isolates was categorized by SnpEff (4.3r) (7) and the ATCC 42720  
86 gene annotation. The reference ATCC 42720 genome was altered to remove  
87 mitochondrial fragments inserted into the nuclear assembly and the mitochondrial contig  
88 (Supercontig\_9) was replaced by a complete mitochondrial genome from strain *C.*  
89 *lusitaniae* CBS 6936 (NC\_022161.1). The following regions were masked out due to  
90 unusually high coverage and likely mitochondrial origin: (Supercontig\_1.2:1869020-  
91 1869184,1664421-1664580; Supercontig\_1.3:1076192-1076578,1324802-  
92 1324956,1353096-1353260; Supercontig\_1.6:126390-126604; Supercontig\_1.8:29199-  
93 29370). Though the analyses described above utilized the published version of the *C.*

94 *lusitaniae* ATCC 42720 (4) genome, we resequenced ATCC 42720 in order to identify  
95 possible sequencing errors present in the published version. This data was used to  
96 correct gene annotations, described below for *CLUG\_01938/01939*, and validate that  
97 SNPs of interests were correctly identified.

98 Genome assemblies of the strains was performed with SPAdes (v3.12.0) (8) after  
99 trimming and adaptor cleanup of the reads was performed with AdaptorRemoval (v2.0)  
100 (9) and quality trimming with sickle (v1.33) (10). *De novo* assemblies were further  
101 screened for vector contamination with vecscreen  
102 (<https://github.com/hyphaltip/autovectorscreen>) before submission to Genbank.

### 103 **Construction of phylogenetic trees**

104 SNPs that varied between clinical isolates were combined into a single multiple  
105 alignment (script `vcftab_to_fasta.pl`) followed by phylogenetic tree inference with IQ-  
106 Tree (11) GTR model incorporating ascertainment bias (GTR+ASC) and 100 bootstrap  
107 replicates (script `make_SNPtree.sh`). A phylogeny based on INDELS, created from a  
108 VCF file containing INDEL positions notated as matching reference (0) or different than  
109 reference (multiple states possible, 1 or 2), was constructed with IQ-TREE (11) using a  
110 multistate Morphological model (MORPH) and 100 bootstrap replicates (script  
111 `make_INDELtree_tableS2.sh`). One tree was constructed solely with the lung isolates  
112 and using only polymorphic sites segregating in those strains. A second tree was  
113 constructed with a dataset that included two outgroup strains ATCC 42720 and CBS  
114 6936 to demonstrate the divergence between the population and other strains.

### 115 **Copy number variation analysis**

116 CNVs were examined by plotting window-based read coverage of the short-read  
117 alignments from each strain. The depth of coverage was constructed with mosdepth  
118 (12), manipulated with shell scripts (mosdepth\_prep\_ggplot.sh) and plotted with R using  
119 ggplot2 (13). Heatmap of chromosome 6 coverage was plotted using the heatmap3 (14)  
120 package in R (15).

### 121 **Independent sequencing of *MRR1***

122 To confirm the presence of SNPs and INDELS in *MRR1*, *MRR1* was amplified  
123 from clinical isolate genomic DNA and sequenced. *MRR1* was amplified using primers  
124 ED050 and ED051 and sequenced using multiple primers (ED052-ED056) by the  
125 Molecular Biology Shared Resource Core at Dartmouth (Sanger cycle sequencing). The  
126 resulting sequences were aligned using SnapGene software (GSL Biotech, Chicago, IL)  
127 to a manually curated version of *MRR1* which contained mutations identified via whole  
128 genome sequencing.

### 129 **Reannotation of reference genome sequences**

130 For *MRR1*: The protein sequences encoded by the *MRR1* orthologs in *C.*  
131 *albicans* (C3\_05920W\_A), *Candida dubliniensis* (Cd36\_85850), *C. parapsilosis*  
132 (Cpar2\_807270), *Candida auris* (Qg37\_07783), and *C. lusitaniae* (Clug\_00542) were  
133 aligned with PRALINE (16) (Fig. S4A). The first 64 amino acids of *C. lusitaniae* MRR1,  
134 based on the annotated start codon in NCBI, shared no homology with Mrr1 from other  
135 *Candida* spp. Primers ED068 and ED069, specific to the first 192 nucleotides of  
136 *CLUG\_00542*, and ED070 and ED071, after nucleotide 193, were used for PCR  
137 amplification from genomic DNA and cDNA (created as described in the quantitative  
138 RT-PCR section). RNA sequencing (RNA-Seq) read coverage was visualized with CLC

139 Genomics Workbench 11.0 (<https://www.qiagenbioinformatics.com/>). The reannotation  
140 of the *CLUG\_00542* start codon changes the gene position on Supercontig 1 to  
141 1,098,284-1,094,487. M65 was used as the start codon when determining the amino  
142 acids affected by SNPs and INDELS in *MRR1*.

143 For *MDR1*: Comparison of the genome sequence surrounding *CLUG\_01938*  
144 from the clinical isolates and the resequenced ATCC 42720 to the previously published  
145 ATCC 42720 (4) genome revealed two sequencing errors (Fig. S8). Manual correction  
146 of these SNPs altered the predicted stop codon for *CLUG\_01938*, resulting in a new  
147 ORF which included both *CLUG\_01938* and *CLUG\_01939*, referred to as *MDR1*.  
148 Clustal Omega (17) was used to align the corrected *C. lusitaniae* Mdr1 sequence with  
149 *C. albicans* Mdr1. RNA-Seq read coverage was visualized with CLC Genomics  
150 Workbench 11.0 (<https://www.qiagenbioinformatics.com/>).

## 151 **RNA sequencing**

152 Overnight cultures were back diluted into YNBG<sub>10</sub> and grown to exponential (~8  
153 h) twice, in biological duplicate. RNA was harvested from snap-frozen pellets (using  
154 liquid nitrogen) using the MasterPure Yeast RNA Purification Kit (Epicentre) and stored  
155 at -80 °C. RNA libraries were prepared using the TruSeq Stranded mRNA Library Prep  
156 Kit (NeoPrep) and sequenced using pair-end 75 bp reads on the Illumina NextSeq500  
157 platform. Data analysis pipeline is available in github repository  
158 ([https://github.com/stajichlab/C\\_lusitaniae\\_DHED1\\_RNAseq/](https://github.com/stajichlab/C_lusitaniae_DHED1_RNAseq/)) and archived as DOI:  
159 10.5281/zenodo.1245794. FASTQ files were aligned to the ATCC 42720 (4) genome  
160 with the splice-site aware and SNP tolerant short read aligner GSNAP (v 2017-11-15)  
161 (18). The alignments were converted to sorted BAM files and read counts computed

162 with featureCounts (19). Data is archived in Open Science Foundation  
163 (<https://osf.io/yjwmg/>). Genes that had less than one counts per million across all  
164 samples (absent genes) were not included for differentially expressed gene analysis.  
165 Using the remaining 5,741 genes, we performed differential expression analysis with the  
166 EdgeR (20) package in Bioconductor, by fitting a negative binomial linear model in R  
167 (15). The resulting P values were corrected for multiple testing with Benjamini-Hochberg  
168 to control the false discovery rate.

### 169 **Quantitative RT-PCR**

170 Overnight cultures were back diluted to an OD<sub>600</sub> of ~0.1 and grown for 6 hours in  
171 YNBG<sub>10</sub>. 7.5 µg RNA (harvested using the MasterPure Yeast RNA Purification Kit  
172 (Epicentre)) was DNase treated with the Turbo DNA-free Kit (Invitrogen). cDNA was  
173 synthesized from 500 ng DNase-treated RNA using the RevertAid H Minus First Strand  
174 cDNA Synthesis Kit (Thermo Scientific), following the manufacturer's instructions for  
175 random hexamer primer (IDT) and GC rich template. qRT-PCR was performed on a  
176 CFX96 Real-Time System (Bio-Rad), using SsoFast Evergreen Supermix (Bio-Rad)  
177 with the primers listed in Table S3. Thermocycler conditions were as follows: 95 °C for  
178 30 s, 40 cycles of 95 °C for 5 s, 65 °C for 3 s and 95 °C for 5 s. Transcripts were  
179 normalized to *ACT1* expression.

### 180 **Drug susceptibility assays**

181 Minimum inhibitory concentration (MIC) was determined using a broth  
182 microdilution method as previously described (21) with slight modifications. 2x10<sup>3</sup> cells  
183 were added to a two-fold dilution series of fluconazole prepared in RPMI-1640, starting  
184 at an initial concentration of 64 µg/ml, then incubated at 35 °C for 24-48 hours. The MIC



185 was defined as the drug concentration that abolished visible growth compared to a  
186 drug-free control. No more than a 2-fold difference was observed between MICs  
187 recorded at 24 and 48 hours; data from the 24-hour timepoint was reported unless  
188 otherwise noted. For comparison to gene expression, FLZ MICs were repeated in  
189 YNBG<sub>10</sub>; there was a strong correlation between FLZ MICs in RPMI-1640 and YNBG<sub>10</sub>  
190 (Fig. 6B). 2383 cultures were supplemented with 50 µg/ml uracil and L15 cultures were  
191 supplemented with 0.02% casamino acids when grown in YNBG<sub>10</sub>; supplementation did  
192 not alter the FLZ MIC of other strains tested.

193 Growth of *C. lusitaniae* cultures in the presence and absence of 4 µg/ml FLZ  
194 were measured on a Synergy Neo microplate reader (Biotek, USA) in a kinetic assay. A  
195 starting concentration of  $\sim 1 \times 10^4$  cells in RPMI-1640 (2% dextrose) was incubated at 35  
196 °C for 18 hours. Following kinetic assay, cultures were plated on YPD +/- 8 µg/ml FLZ to  
197 enumerate CFUs. Isolates from the YPD control plates were further patched onto  
198 CHROMagar as necessary.

199 Drug susceptibility on plates was assessed using YNBG<sub>100</sub> supplemented with  
200 different concentrations of antifungals (Fig. S5). Susceptibility was defined as at least a  
201 50% reduction in visible growth after 48h at 30 °C. Antifungal stocks included:  
202 fluconazole (Sigma-Aldrich) at 4 mg/ml in DMSO, caspofungin (Sigma-Aldrich) at 15  
203 mg/ml in dH<sub>2</sub>O, Amphotericin B (Sigma-Aldrich) at 2 mg/ml in DMSO and cerulenin  
204 (Cayman Chemicals) at 20 mg/ml in DMSO.

### 205 **Mating and progeny assessment**

206 Cycloheximide resistant (*chx*<sup>R</sup>) derivatives of the clinical isolates were selected  
207 for on YPD containing 10 µg/ml cycloheximide (A.G. Scientific, Inc) (22). The 5-FOA

208 resistant MAT $\alpha$  strain 2383 was mated to chx<sup>R</sup> derivatives of the MAT $\alpha$  clinical isolates  
209 on SLAD medium (2% agar, 0.17% YNB without amino acids or ammonium sulfate, 2%  
210 glucose, and 50  $\mu$ M ammonium sulfate) as previously described (22). In brief, following  
211 a PBS wash, an OD<sub>600</sub> of 0.5 of each parental strain was combined and resuspended to  
212 a final volume of 1 mL in PBS. 5  $\mu$ L of each mixture were incubated on SLAD plates at  
213 30°C for 72 hours. Mating spots were scraped up and resuspended in 500  $\mu$ L H<sub>2</sub>O then  
214 50  $\mu$ L aliquots were plated on double selection medium (1.5% agar, 0.17% YNB without  
215 amino acids, 2% glucose, 10  $\mu$ g/ml cycloheximide, 1 mg/ml 5-FOA, 50  $\mu$ g/ml uracil) and  
216 incubated for 2-4 days at 30°C to select for products of meiosis that contained the  
217 resistance markers from both parental strains. Each parental strain alone was used as a  
218 control to assess the level of spontaneous resistance due to mutation on the double  
219 selection medium. The FLZ MIC and *MRR1* allele was determined for approximately  
220 thirty haploid progeny from each cross. *MRR1* allele was determined by amplification of  
221 a *MRR1* fragment with SNP specific primers which detected the presence or absence of  
222 the SNPs causing the Mrr1 variants H467L (ED062, ED063), L1191H+Q1197\* (ED064,  
223 ED065) and Y813C (ED066, ED067).

#### 224 **Mutant construction**

225 Mutants were constructed as previously described using an expression free  
226 ribonucleoprotein CRISPR-Cas9 method (23). Primers used to create knockout  
227 constructs and crRNA are listed in Table S3.

#### 228 ***In vitro* evolution**

229 Overnight cultures were washed with dH<sub>2</sub>O and diluted into fresh YNBG<sub>10</sub> to an  
230 OD<sub>600</sub> of 0.04. Cultures were grown at 30 °C on a roller drum for 48 h, before passaging

231 into fresh YNBG<sub>10</sub> medium, inoculated to an OD<sub>600</sub> of 0.04. Each passage yielded  
232 approximately 4-5 duplications. CFU were enumerated in triplicate after plating onto  
233 YPD agar containing DMSO (control), 4 µg/ml or 16 µg/ml FLZ and incubation at 30 °C  
234 for 36 hours.

### 235 **Histatin 5 (Hst 5) sensitivity assay**

236 Hst 5 susceptibility was measured as previously described (24) with the following  
237 modifications. Briefly, 5 ml of YPD medium was inoculated and grown at room  
238 temperature overnight while shaking. Overnight cultures were back diluted into fresh  
239 YPD and grown for 4 hours, to reach an OD<sub>600</sub> of ~1. Cells were washed twice with 10  
240 mM sodium phosphate buffer (NaPB) at pH7.4. Approximately 6x10<sup>3</sup> cells were  
241 incubated in NaPB (control) or NaPB containing 3.75 µM Hst 5 (GenScript) at 30 °C for  
242 1 hour. CFUs were enumerated after 24-48 hours growth on YPD agar plates. Assays  
243 were performed in triplicate for each strain. The percent survival was calculated as  
244 [number of colonies from Hst 5-treated cells/number of colonies from control cells] x  
245 100%.

### 246 ***Pseudomonas aeruginosa* zone of inhibition**

247 Overnight cultures of *C. lusitaniae* were adjusted to an OD<sub>600</sub> of 0.1 in dH<sub>2</sub>O and  
248 spread onto 20 ml YPD agar plates with a sterile swab (approximately 2x10<sup>4</sup> cells per  
249 plate). Cells from overnight cultures of *P. aeruginosa* were resuspended in dH<sub>2</sub>O to an  
250 OD<sub>600</sub> of 1. 2 µl of the suspension was applied on top of agar that was inoculated with  
251 *C. lusitaniae*. Plates were incubated at 30 °C for 48 hours before the zone of clearance  
252 or inhibition (inhibited *C. lusitaniae* growth) surrounding the *P. aeruginosa* colony was  
253 measured, in millimeters. Strains were measured in quintuplicate.

## 254 **Statistical analyses**

255           Statistical analyses were done using GraphPad Prism 6 (GraphPad Software).  
256 Unpaired Student's t-tests (two-tailed) with Welch's correction were used to evaluate the  
257 difference in FLZ MIC between mating progeny. One and two-way ANOVA tests were  
258 performed across multiple samples with either Tukey's multiple comparison test for  
259 unpaired analyses or Sidak's multiple comparison test for paired analyses conducted in  
260 a pairwise fashion, for MIC and expression data analysis. Pearson's and Spearman's  
261 correlation analyses were performed for comparison of FLZ MIC, *MDR1* expression and  
262 zone of inhibition. P values <0.05 were considered as significant for all analyses  
263 performed and are indicated with asterisks: \*P<0.05, \*\*P<0.01, \*\*\*P<0.001 and  
264 \*\*\*\*P<0.0001.

## 265 **Data availability**

266           The data supporting the findings in this study are available within the paper and  
267 its supplemental information and are also available from the corresponding author upon  
268 request. The raw sequence reads from whole genome sequencing and RNA-Seq data  
269 have been deposited into NCBI sequence read archive under BioProject PRJNA433226  
270 and SRP133092. Raw and processed RNA-Seq count data are available in Gene  
271 Expression Omnibus (GSE111421). Assemblies are deposited and associated with  
272 BioProject PRJNA433226 and under accessions QOBD00000000...QOBX00000000.

## 273 **Code availability**

274           Names of custom codes used for analysis are indicated in where appropriate in  
275 above methods. All codes and sequences are available in the indicated github  
276 repositories: analysis pipeline and scripts for whole genome sequencing, phylogeny and

277 CNV analysis are available at [https://github.com/stajichlab/C\\_lusitaniae\\_popseq](https://github.com/stajichlab/C_lusitaniae_popseq) and  
278 RNA-Seq analysis pipeline and scripts at  
279 [https://github.com/stajichlab/C\\_lusitaniae\\_DHED1\\_RNAseq](https://github.com/stajichlab/C_lusitaniae_DHED1_RNAseq). These are archived with  
280 Zenodo under DOI: 10.5281/zenodo.1346354  
281 and DOI: 10.5281/zenodo.1245794.

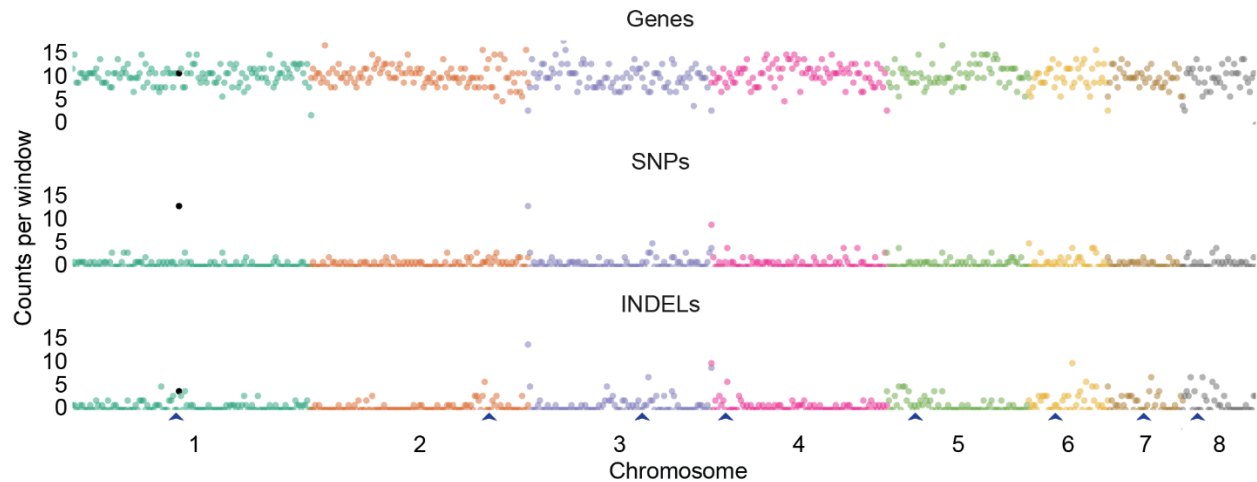

282

283

284

285

286

287

288

**Fig. S1. Distribution of SNPs and INDELS.** Number of genes, inter-isolate SNPs and inter-isolate INDELS within non-overlapping 20 kilobase windows for each nuclear chromosome (1-8), highlighted in different colors. Centromeres locations (25) denoted by blue arrowheads above chromosome numbers. The black circle denotes the 20 kilobase window on chromosome 1 that includes *MRR1* (1,094,487...1,098,284). For reference, the chromosome 1 centromere is located at 1,056,291...1,060,764 (25).

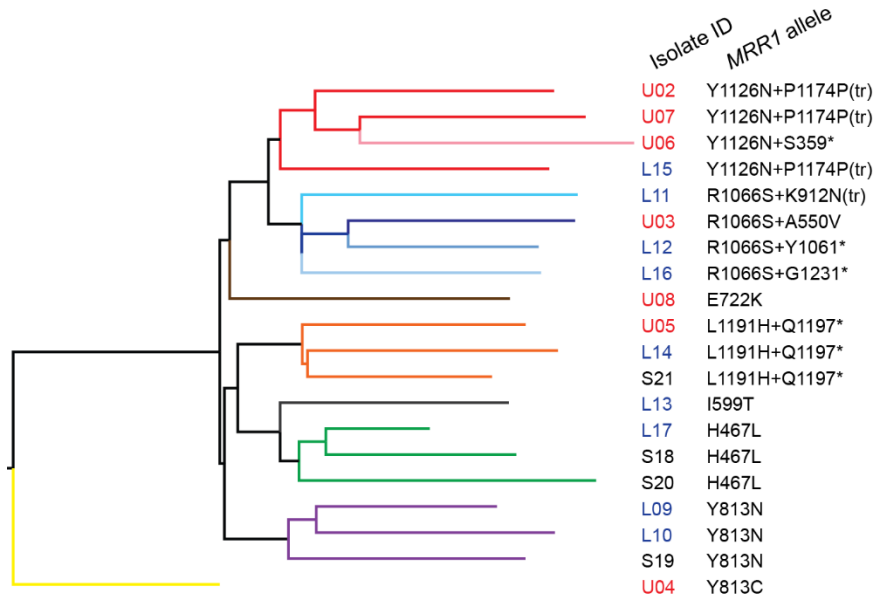

289

290

**Fig. S2. Phylogenetic tree based on inter-isolate INDELs mirrors genomic**

291

**relationships seen among SNPs.** Maximum-likelihood tree based on the 538 inter-

292

isolate INDELs which vary between the twenty clinical isolates. Branch arms are colored

293

by *MRR1* allele, color scheme matches Fig. 1C. Sample names are color coded by

294

sample of origin: UL BAL (red), LL BAL (blue), Sp1 (black).

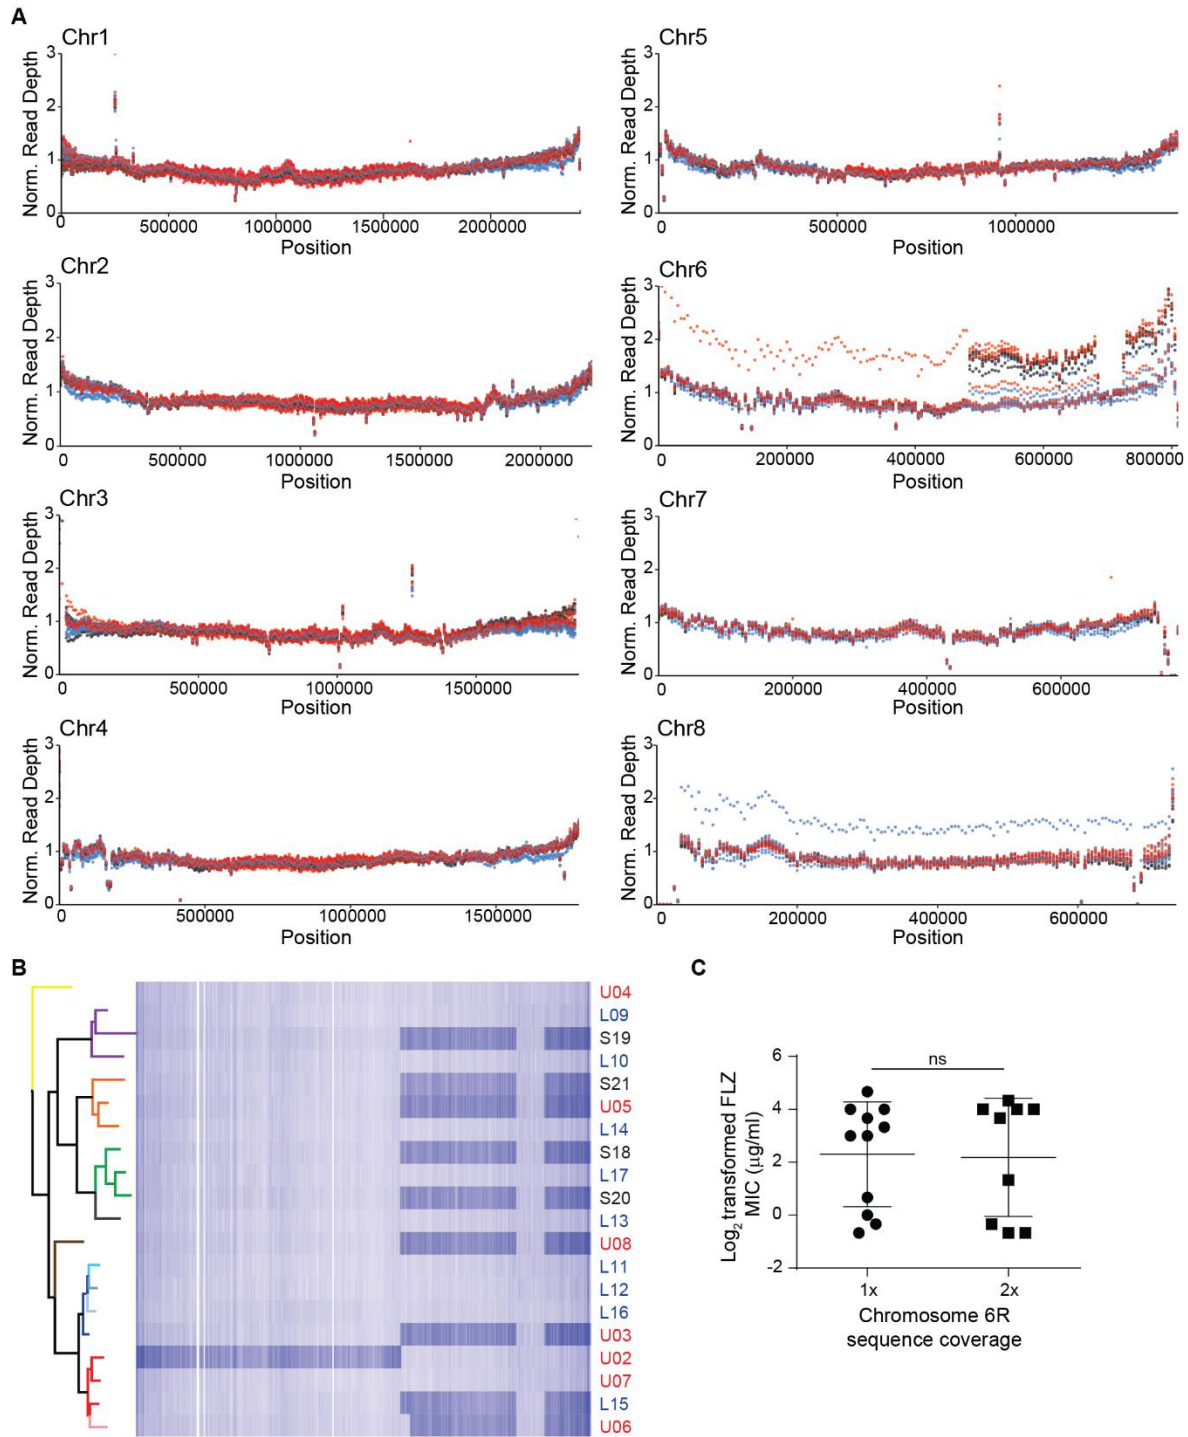

295

296 **Fig. S3. Copy number variation.** (A) Normalized read depth across each nuclear  
 297 chromosome (Chr 1-8) plotted within non-overlapping 5 kilobase windows. Isolates are  
 298 colored by sample from which they were isolated: UL (red), LL (blue) and Sp1 (black).  
 299 (B) Heatmap of read depth for chromosome 6 (increased coverage indicated by darker



300 blue color), clustered by maximum-likelihood tree based on inter-isolate SNPs, left, with  
301 branches colored by *MRR1* allele (Fig. 1C). Isolate identifiers, right, are colored by  
302 sample of origin, UL (red), LL (blue) and Sp1 (black). (C) Log<sub>2</sub> transformed FLZ MICs  
303 (μg/ml) of isolates in RPMI at 24 hours grouped by coverage of the right arm of  
304 chromosome 6. Mean ± s.d. from three independent replicates shown, ns = not  
305 significant, P=0.9018.

**A**

Unconserved 0 1 2 3 4 5 6 7 8 9 10 Conserved

|               |                                                             |
|---------------|-------------------------------------------------------------|
| CaMrr1        | .....10.....20.....30.....40.....50                         |
| CdMrr1        | .....                                                       |
| CpMrr1        | .....                                                       |
| CaurMrr1      | .....                                                       |
| CI_Mrr1_NCBI  | MARGCVCRVP QL SMTHVWHG DVAKGI CPNA VYLRI ATRNA EHI TLSFFLR  |
| CI_Mrr1_study | .....                                                       |
| Consistency   | 000000000 000000000 000000000 000000000 000000000           |
| CaMrr1        | .....60.....70.....80.....90.....100                        |
| CdMrr1        | .....MSIA TTPI ETPKSP KSTEPQVRKR KKVSTVCTNC                 |
| CpMrr1        | .....MSVA TPTEI ---P KSNETQVRKR RKVSTVCTNC                  |
| CaurMrr1      | MS AVSAEFAQPQ TNEI KEEAKQ TMOHQHQRRL KRPSLVCTNC             |
| CI_Mrr1_NCBI  | MVSSKDS ADTSLTRENL EGAAPQNI K LESDKRRKRK PRGI I VCKNC       |
| CI_Mrr1_study | ASTPQHSETS LLKMMEVQTO NDKPRVSAAA QESAGQKRKR SRAVI VCTYC     |
| Consistency   | 000000002 1000114635 5343323334 4564364888 48456*175*       |
| CaMrr1        | .....110.....120.....130.....140.....150                    |
| CdMrr1        | RKRKI RCDRQ HPCNCCI KSK KHNAQVYDDG QVSPANFSTN GSSHGNTVPE    |
| CpMrr1        | KKRKI RCDRQ HPCKNCI KSK KHSACVYDDG QVSPANLPTN GSSHGI I VPE  |
| CaurMrr1      | RKRKVRCDKQ RPKSNCVKFH QTNTCTYDEP QADNMKGFL ELRLPMTKSN       |
| CI_Mrr1_NCBI  | RRRKKVCKDKQ SPCSNCVKVG I ADTCTYDSSH TDKKGDKYE MELALPLGQQ    |
| CI_Mrr1_study | RRRKKVCKDKQ SPCSNCVKVG I ADTCTYDSSH TDKKGDKYE MELALPLGQQ    |
| Consistency   | 88**98**8* 3**7**9*43 2345*5**63 4344432444 3543224345      |
| CaMrr1        | .....160.....170.....180.....190.....200                    |
| CdMrr1        | SRPYEESARI PI RFDAAEAPR KSKKPNTPNN ERKNSKSPD NTVANNQQT A    |
| CpMrr1        | SRPYEDSAKI PI RFNNEVSR KSKKVPNTPNN EHKTTKSRD KTKVSNPQT A    |
| CaurMrr1      | KQPLSFVNNS SPTSTAGSSS RKRGNTSQEE SSKSKSDTT ---              |
| CI_Mrr1_NCBI  | LSRGNKPFDD DLI NKRKRDR DS AKQMF DAN NTLSENKAYL KHLKDRI HNL  |
| CI_Mrr1_study | PLDSVAKEAN I GVSQGFAYA SGAGTAKSAQ NGPKRI RSEK GLTASAPSSA    |
| Consistency   | PMDSVAKEAN I GVSQGFAYA SGAGTAKSAH NGPKRMKSEK RL TASAPSSA    |
| Consistency   | 3443433433 3244342534 5565444445 6335438733 3223422345      |
| CaMrr1        | .....210.....220.....230.....240.....250                    |
| CdMrr1        | SENEVTI TLS ELNMLKQRLQ NI EANI NAQS NPGSNPSYVP QTPAYPTQPN   |
| CpMrr1        | SENEVTI SLS ELNMLKQRLQ NI EANI N--- AQANNPSFVP PSSPYPTQPN   |
| CaurMrr1      | -SDQLSNLL EI KMLKQRL E SI ESNLH--- -HNGSSNENS               |
| CI_Mrr1_NCBI  | ESAFNLNGSK SLSQSSPSI K ASHASQNSPG YSVSTLPSI T SHSNNASNCG    |
| CI_Mrr1_study | YSAASSHEQS AGNLAYGTTN RAPS GPI MGP SNGAPHVSGV SPAGSVPNYG    |
| Consistency   | YSAASSHDQS AGNLAYGTTN RAPS GPI MGP SNGAPNVNGV SPAGSVPNYG    |
| Consistency   | 2744562446 5466544655 4547534211 2224212222 3354444625      |
| CaMrr1        | .....260.....270.....280.....290.....300                    |
| CdMrr1        | L LPPPVSFNS WSPKQSNERV MFSQQRLTT NYNVSHTRGQ SPSI QLPLPS     |
| CpMrr1        | I LPPPVSFNS WSPKQSNDR I MFSQQRLTT NYNVSNTRGQ SPSI QLPLPS    |
| CaurMrr1      | PNYQTPPANK HLQLAQATAPY SI PSPVLRPR TI QPSLSTI Y NLSNTRSPSS  |
| CI_Mrr1_NCBI  | I TPTQQQSYA SSGI TNSFPI PSI VQSSSEQ NRQPSSLPP FNHQATNNHA    |
| CI_Mrr1_study | EPNASSTASM SSASGATTNF TSPSTYSGGG QTPGYAGFER PANSTI KTMP     |
| Consistency   | EPNASSTASM SSASGATTNF TSPSTYSGGG QTPGYAGFER PANATI KTMP     |
| Consistency   | 3334435554 3544456345 4434534233 5342435324 3363544445      |
| CaMrr1        | .....310.....320.....330.....340.....350                    |
| CdMrr1        | FKDTPRASID SAPLYSEMSP PRSDLI ASSL TSPESI QMSV SGDV-----     |
| CpMrr1        | FKDTPRGSID SVRLYSEMSP PRSDLI ESSL TSPESI QL PV SGDI-----    |
| CaurMrr1      | I QLPSI RDHM PPHESPI SSS I TGQSVSSTA TSPNYI PPD S RTNL----- |
| CI_Mrr1_NCBI  | RRI HSSL FER NSLPEI RHPD LDI RHDYRPI FERDRTHAGE GLSVSHPFSG  |
| CI_Mrr1_study | RSRDVLKQAD TQTI ETQKSE I EVL KQRLQQ I EKTLMGSPK SLPALSAQPN  |
| Consistency   | RSRDVDPKQAD TQTI ETQKSE I EVL KQRLQQ I EKTLMGSPK SLPALSAQPN |
| Consistency   | 3533433435 5334444474 4443333444 5654363344 6346111011      |
| CaMrr1        | .....360.....370.....380.....390.....400                    |
| CdMrr1        | .....                                                       |
| CpMrr1        | .....                                                       |
| CaurMrr1      | SPSRKSPLDN CQSSHAPYF-----                                   |
| CI_Mrr1_NCBI  | AFPPMPMQPS APPSSQLYQ GPPQPSMQP LGVQPAPFQL GQRPSYYPGM        |
| CI_Mrr1_study | AFPPMPMQPS APPSSQLYQ GPPQPSMQP LGVQPAPFQL GQRPSYYPGM        |
| Consistency   | 1010110011 1112110110 0000000000 0000000000 0000000000      |
| CaMrr1        | .....410.....420.....430.....440.....450                    |
| CdMrr1        | .....                                                       |
| CpMrr1        | .....                                                       |
| CaurMrr1      | .....                                                       |
| CI_Mrr1_NCBI  | TPGTI PMPSS SAFTPLSQRN SFSEDPMLAM LPPLNSNLKR SGGSSQPLQA     |
| CI_Mrr1_study | TPGTI PMPSS SAFTPLSQRN SFSEDPMLAM LPPLNSNLKR SGGSSQPLQA     |
| Consistency   | 0000000000 0000000000 0000000000 0000000000 0000000000      |
| CaMrr1        | .....460.....470.....480.....490.....500                    |
| CdMrr1        | .....                                                       |
| CpMrr1        | .....                                                       |
| CaurMrr1      | .....                                                       |
| CI_Mrr1_NCBI  | NSVGPFPGQSV KPAASESSSA TGCEACNAT STACNTSPAT TETPPKLTIE      |
| CI_Mrr1_study | NSAGPFPGQSV KPAASESSSA TGCEVCNAT STACNTSPAT TETPPKLTIE      |
| Consistency   | 0000000000 0000000000 0000000000 0000000000 0000000000      |

|               |  |          |        |      |       |         |     |        |       |      |     |      |
|---------------|--|----------|--------|------|-------|---------|-----|--------|-------|------|-----|------|
|               |  | 510      |        | 520  |       | 530     |     | 540    |       | 550  |     |      |
| CaMrr1        |  | -----VG  | VNPYLN | ETET | I     | NFYDGY  | TSI | CVRD-  | FRRVN | HGPF | AWS | SLM  |
| CdMrr1        |  | -----VG  | VNPYLN | ETET | I     | NFYDGY  | TSI | CVRD-  | FRRVN | HGPF | AWS | SLM  |
| CpMrr1        |  | -----LG  | VNPYLN | EMET | I     | NFDNYSS | I   | CCKD-  | FMRVN | YGPF | AWT | SMM  |
| CaurMrr1      |  | -----IG  | VNPHAH | TD   | I     | NFYHGY  | SSV | HYKD-  | LRRLN | FGPF | AWS | SLM  |
| CI_Mrr1_NCBI  |  | NPKAEDFL | I      | VNI  | YNSAD | T       | I   | NFYENY | SSL   | HFKN | DL  | RRLN |
| CI_Mrr1_study |  | NPKAEDFL | I      | VNI  | YNSAD | T       | I   | NFYENY | SSL   | HVKD | DL  | RRLN |
| Consistency   |  | 0.000000 | 0.8*   | 5.8  | 5.4   | 6.7*    | 8*  | 4.4    | 8*    | 1.6  | 7*  | 5*   |

|               |  |        |      |     |        |       |       |       |       |      |     |      |
|---------------|--|--------|------|-----|--------|-------|-------|-------|-------|------|-----|------|
|               |  | 560    |      | 570 |        | 580   |       | 590   |       | 600  |     |      |
| CaMrr1        |  | RKDKAL | SSLW | NH  | LKKKEK | ----- | ----- | KNVAS | Q     | TFV  | FGQ | DVHE |
| CdMrr1        |  | RKDKAL | SSLW | NH  | LKKKEK | ----- | ----- | KNVES | Q     | TFV  | FGQ | DVHE |
| CpMrr1        |  | KRDDGL | LTLW | EF  | SKQES  | ----- | ----- | ----- | SQ    | NFV  | VCP | VSNE |
| CaurMrr1      |  | KRDYGL | RLLW | DY  | VSKKEK | ST    | KGQFL | SRS   | VAL   | MFA  | QTS | D    |
| CI_Mrr1_NCBI  |  | KRDYGL | RLLW | DH  | I      | AQK   | QST   | KDD   | ----- | SSAL | AF  | PQQT |
| CI_Mrr1_study |  | KRDYGL | RLLW | DH  | I      | AQK   | QST   | KDD   | ----- | SSAL | AF  | PQQT |
| Consistency   |  | 8.8*   | 4.7* | 4.5 | 7*     | 6.6   | 9     | 6.5   | 7*    | 8.6  | 1.1 | 1.0  |

|               |  |        |       |     |       |      |      |     |     |     |      |      |
|---------------|--|--------|-------|-----|-------|------|------|-----|-----|-----|------|------|
|               |  | 610    |       | 620 |       | 630  |      | 640 |     | 650 |      |      |
| CaMrr1        |  | ISQENT | QLVA  | SES | NESE  | TKF  | KKKT | LET | FGF | NDV | VPY  | DI   |
| CdMrr1        |  | ISQENT | QLVA  | SES | NESE  | TKF  | KKKT | LET | FGF | SDV | VPY  | DI   |
| CpMrr1        |  | VTKENT | QVVI  | SD  | NNES  | DMQF | RKR  | LET | NGY | SDV | VPY  | NMLK |
| CaurMrr1      |  | LSKGR  | EDEHS | EK  | QFERR | LQ   | TG   | VDD | MI  | PY  | EKVI | RAR  |
| CI_Mrr1_NCBI  |  | ILHADK | SELS  | EK  | QFRKR | LQ   | AD   | G   | EDI | VPY | NTI  | LEAK |
| CI_Mrr1_study |  | ILHADK | SELS  | EK  | QFRKR | LQ   | AD   | G   | EDI | VPY | NTI  | LEAK |
| Consistency   |  | 8.5    | 5.5   | 5.5 | 4.4   | 6.6  | 5.4  | 6.5 | 5.4 | 4.4 | 6.5  | 9.7  |

|               |  |        |      |     |      |       |     |     |      |     |     |     |
|---------------|--|--------|------|-----|------|-------|-----|-----|------|-----|-----|-----|
|               |  | 660    |      | 670 |      | 680   |     | 690 |      | 700 |     |     |
| CaMrr1        |  | TSPLGL | TLVE | EQ  | NMEL | QLV   | DRI | HQ  | L    | PKK | KVL | WKL |
| CdMrr1        |  | TLPLGL | TLVE | EQ  | NMEL | QLV   | DRI | HQ  | L    | PKK | KVL | WKL |
| CpMrr1        |  | TLQELT | LFDF | NQ  | L    | GCELL | I   | DRI | RRT  | L   | PSK | KVV |
| CaurMrr1      |  | TLSLGL | TVFD | GQ  | I    | DREL  | Q   | I   | EKI  | EV  | V   | L   |
| CI_Mrr1_NCBI  |  | TLPLGL | TVFD | GQ  | I    | DREL  | Q   | I   | EKVR | V   | V   | L   |
| CI_Mrr1_study |  | TLPLGL | TVFD | GQ  | I    | DREL  | Q   | I   | EKVR | V   | V   | L   |
| Consistency   |  | 7.5    | 7*   | 6.8 | 8*   | 4*    | 8.5 | 4*  | 7.9  | 7.9 | 5.4 | 4*  |

|               |  |      |       |     |     |     |      |     |      |     |     |     |
|---------------|--|------|-------|-----|-----|-----|------|-----|------|-----|-----|-----|
|               |  | 710  |       | 720 |     | 730 |      | 740 |      | 750 |     |     |
| CaMrr1        |  | LDEI | DFRES | V   | TKI | I   | GETE | YK  | DEKI | KEL | KVE | KRL |
| CdMrr1        |  | LDEI | DFRQ  | S   | TKI | I   | GEKE | YK  | DEKI | KEL | KVE | KRL |
| CpMrr1        |  | LI   | EEEE  | EW  | EKI | I   | GPR  | SYE | DVP  | F   | KDL | KI  |
| CaurMrr1      |  | I    | DEDF  | FR  | KDV | ESI | I    | GP  | ESY  | D   | VPI | DKI |
| CI_Mrr1_NCBI  |  | LDEY | FRRD  | V   | SRI | I   | GP   | ESY | DES  | V   | PDI | KI  |
| CI_Mrr1_study |  | LDEY | FRRD  | V   | SRI | I   | GP   | ESY | DES  | V   | PDI | KI  |
| Consistency   |  | 9.7  | 4.4   | 7.6 | 4.8 | 5.6 | 6.5  | 7.6 | 5.4  | 7.6 | 8.8 | 9.7 |

|               |  |        |       |     |     |     |     |     |     |     |    |    |
|---------------|--|--------|-------|-----|-----|-----|-----|-----|-----|-----|----|----|
|               |  | 760    |       | 770 |     | 780 |     | 790 |     | 800 |    |    |
| CaMrr1        |  | SLFCNK | ESVN  | EM  | RL  | KT  | TD  | PS  | PEA | Q   | M  | K  |
| CdMrr1        |  | SLFCNK | ESVN  | EM  | RL  | KT  | TD  | PS  | PEA | Q   | M  | K  |
| CpMrr1        |  | SLFSNK | TSEN  | EER | L   | N   | T   | DPN | PKA | Q   | T  | K  |
| CaurMrr1      |  | SLFSNN | SALN  | EAI | L   | NN  | P   | N   | DE  | K   | V  | I  |
| CI_Mrr1_NCBI  |  | SVFSNN | TSELN | EQ  | I   | R   | S   | E   | A   | R   | T  | L  |
| CI_Mrr1_study |  | SVFSNN | TSELN | EQ  | I   | R   | S   | E   | A   | R   | T  | L  |
| Consistency   |  | 8*     | 6*    | 6.5 | 6.5 | 4.4 | 6.6 | 5.4 | 6.8 | 5.8 | 4* | 6* |

|               |  |     |     |     |     |     |     |     |     |     |     |    |
|---------------|--|-----|-----|-----|-----|-----|-----|-----|-----|-----|-----|----|
|               |  | 810 |     | 820 |     | 830 |     | 840 |     | 850 |     |    |
| CaMrr1        |  | I   | FR  | K   | T   | S   | M   | P   | V   | L   | Q   | A  |
| CdMrr1        |  | I   | FR  | K   | T   | S   | M   | P   | V   | L   | Q   | A  |
| CpMrr1        |  | I   | L   | R   | R   | A   | S   | L   | P   | L   | I   | Y  |
| CaurMrr1      |  | I   | L   | R   | R   | S   | N   | F   | T   | V   | L   | Y  |
| CI_Mrr1_NCBI  |  | LL  | R   | R   | S   | N   | F   | T   | V   | L   | Y   | Y  |
| CI_Mrr1_study |  | LL  | R   | R   | S   | N   | F   | T   | V   | L   | Y   | Y  |
| Consistency   |  | 8.7 | 8.6 | 7.6 | 5.8 | 9.8 | 6.8 | 6.8 | 5.8 | 5.6 | 5.8 | 8* |

|               |  |     |    |     |     |     |     |     |     |     |    |     |
|---------------|--|-----|----|-----|-----|-----|-----|-----|-----|-----|----|-----|
|               |  | 860 |    | 870 |     | 880 |     | 890 |     | 900 |    |     |
| CaMrr1        |  | LN  | R  | P   | D   | N   | F   | K   | D   | V   | L  | N   |
| CdMrr1        |  | LN  | R  | P   | D   | N   | F   | K   | D   | V   | L  | N   |
| CpMrr1        |  | LN  | R  | P   | D   | N   | F   | K   | D   | V   | L  | N   |
| CaurMrr1      |  | MN  | R  | P   | D   | N   | F   | K   | D   | V   | L  | N   |
| CI_Mrr1_NCBI  |  | LN  | R  | P   | D   | N   | F   | K   | D   | V   | L  | N   |
| CI_Mrr1_study |  | LN  | R  | P   | D   | N   | F   | K   | D   | V   | L  | N   |
| Consistency   |  | 9*  | 6* | 6.3 | 1.2 | 2.4 | 6.4 | 8.4 | 8.7 | 9*  | 6* | 6.5 |

|               |  |     |    |     |     |     |     |     |     |     |     |     |
|---------------|--|-----|----|-----|-----|-----|-----|-----|-----|-----|-----|-----|
|               |  | 910 |    | 920 |     | 930 |     | 940 |     | 950 |     |     |
| CaMrr1        |  | DT  | K  | P   | F   | I   | E   | E   | G   | N   | E   | N   |
| CdMrr1        |  | DT  | K  | P   | F   | I   | E   | E   | G   | N   | E   | N   |
| CpMrr1        |  | DT  | K  | P   | F   | I   | E   | E   | G   | N   | E   | N   |
| CaurMrr1      |  | DI  | M  | D   | V   | C   | E   | P   | G   | S   | E   | N   |
| CI_Mrr1_NCBI  |  | DV  | K  | P   | L   | I   | P   | G   | E   | N   | L   | L   |
| CI_Mrr1_study |  | DV  | K  | P   | L   | I   | P   | G   | E   | N   | L   | L   |
| Consistency   |  | 6.7 | 3* | 5.3 | 4.5 | 5.8 | 6.7 | 6.7 | 2.5 | 4.3 | 3.3 | 5.5 |

|               |  |     |     |     |     |     |     |     |    |      |     |     |
|---------------|--|-----|-----|-----|-----|-----|-----|-----|----|------|-----|-----|
|               |  | 960 |     | 970 |     | 980 |     | 990 |    | 1000 |     |     |
| CaMrr1        |  | RSK | V   | S   | E   | I   | C   | K   | L  | N    | Q   | F   |
| CdMrr1        |  | RSK | V   | S   | E   | I   | C   | K   | L  | N    | Q   | F   |
| CpMrr1        |  | RT  | K   | S   | E   | L   | T   | N   | L  | I    | S   | E   |
| CaurMrr1      |  | GT  | N   | P   | L   | C   | E   | D   | L  | S    | D   | F   |
| CI_Mrr1_NCBI  |  | RV  | P   | L   | C   | E   | S   | L   | S  | N    | A   | E   |
| CI_Mrr1_study |  | RV  | P   | L   | C   | E   | S   | L   | S  | N    | A   | E   |
| Consistency   |  | 7.5 | 4.8 | 5.7 | 8.7 | 5.6 | 9.7 | 5.4 | 8* | 8.6  | 6.9 | 5.5 |

|               |  |      |     |      |     |      |    |      |    |      |     |    |
|---------------|--|------|-----|------|-----|------|----|------|----|------|-----|----|
|               |  | 1010 |     | 1020 |     | 1030 |    | 1040 |    | 1050 |     |    |
| CaMrr1        |  | SL   | K   | S    | F   | L    | V  | S    | Y  | F    | H   | L  |
| CdMrr1        |  | SL   | K   | S    | F   | L    | V  | S    | Y  | F    | H   | L  |
| CpMrr1        |  | SM   | K   | S    | F   | L    | V  | S    | T  | F    | Y   | H  |
| CaurMrr1      |  | SL   | K   | T    | F   | L    | S  | V    | Y  | F    | H   | L  |
| CI_Mrr1_NCBI  |  | AL   | R   | V    | S   | F    | L  | A    | I  | F    | F   | H  |
| CI_Mrr1_study |  | AL   | R   | V    | S   | F    | L  | A    | I  | F    | F   | H  |
| Consistency   |  | 8.9  | 8.5 | 5.7  | 8.7 | 8.8  | 8* | 6*   | 4* | 7.5  | 4.7 | 8* |

|               |               |                |                |             |            |
|---------------|---------------|----------------|----------------|-------------|------------|
|               | 1060          | 1070           | 1080           | 1090        | 1100       |
| CaMrr1        | SEVVCDMVI N   | PKL I QI I HKA | NQI NI ALI I R | VNMSI YRMKN | SQHHAENCKK |
| CdMrr1        | SEVVCDMVI N   | PKL I QI I HKA | NQI NI ALI I R | VNMSI YRMKS | SKLHAENCKN |
| CpMrr1        | SAVI CDMFI N  | PKLQHI I HKL   | NQLNI AVI I R  | VNLTI YRLKS | OPDHSRCLS  |
| CaurMrr1      | SEVI SDMI I N | PTLEMAI HKS    | NQI NLSVI VR   | VNYLI FHLKK | SPDHERLWRT |
| CI_Mrr1_NCBI  | SEVVSDMI I N  | PTLEMAVHKA     | NI I YLAAI I R | VNFAVYHLRQ  | SSEHDQRCKN |
| CI_Mrr1_study | SEVVSDMI I N  | PTLEMAVHKA     | NI I YLAAI I R | VNFAVYHLRQ  | SSEHDQRCKN |
| Consistency   | *7*95**7**    | *5*4569**6     | *595886*9*     | **55986885  | 844*554765 |

|               |             |            |              |             |             |
|---------------|-------------|------------|--------------|-------------|-------------|
|               | 1110        | 1120       | 1130         | 1140        | 1150        |
| CaMrr1        | DDFYYSYKE   | LCKFSSCLTR | CAEVGI AAVS  | KLSTRYYYAW  | KI TKGHNFLL |
| CdMrr1        | DDFYYSYKE   | LCKFSSCLTR | CAEVGI AAVS  | KLSTRYYYAW  | KI TKGHNFLL |
| CpMrr1        | DNAYEYKE    | LCKLSSCLTR | SAEVS I AAVS | KLSSRYFYAW  | KLTKSHSYFL  |
| CaurMrr1      | DNAYFNYQL   | LCQLSSAVTR | AAEFTI SAI S | KL SNRYYYAW | RI TRGQTYLL |
| CI_Mrr1_NCBI  | DKQYLT YFQK | LCQLSSCLTR | ASEYSI SAI S | KI SNRYYYAW | RI TKGQTFML |
| CI_Mrr1_study | DKQYLT YFQK | LCQLSSCLTR | ASEYSI SAI S | KI SNRYYYAW | RI TKGQTFML |
| Consistency   | *53*55*875  | *77**78**  | 58*55*789*   | *8*6**8**   | 89*886866*  |

|               |             |              |             |              |            |
|---------------|-------------|--------------|-------------|--------------|------------|
|               | 1160        | 1170         | 1180        | 1190         | 1200       |
| CaMrr1        | KTI TSMEFYE | KE -STNAQEI  | TLPKYKLEQI  | ADLENI CEVA  | LNKLGKTSVM |
| CdMrr1        | KTI TSMEFYE | KE -VMNSQDI  | TLPKYKLEQI  | VDLESI CEVA  | LNKLGKTVQM |
| CpMrr1        | KVVTSMDFYN  | DNLVKANSKV   | RFPDFSTAQI  | KELVNLCEGT   | LRRLGKVELM |
| CaurMrr1      | KTI TLTQFYE | DN -YLKASQL  | YSI RYTYDQV | KELVTI CEST  | LSKFSKTEFC |
| CI_Mrr1_NCBI  | KTVTSTQFYE  | SN -YHAAAYSL | YSTRFSCOQI  | DELI CI CETT | LSKFRHTEFR |
| CI_Mrr1_study | KTVTSTQFYE  | SN -YHAAAYSL | YSTRFSCOQI  | DELI CI CETT | LSKFRHTEFR |
| Consistency   | *89*757**8  | 5604346458   | 44468635*9  | 38*549**47   | *686468754 |

|               |             |              |            |            |             |
|---------------|-------------|--------------|------------|------------|-------------|
|               | 1210        | 1220         | 1230       | 1240       | 1250        |
| CaMrr1        | GDEFCSNVNY  | -----KKYKG   | DQTYSTSSSE | SSTPNKDSPL | DSRKYTNDFG  |
| CdMrr1        | GDEFCSNVNY  | -----RKYKG   | DQTYSTSSSE | SSTPNKDSPL | DSRKYTNDFG  |
| CpMrr1        | GKEFCCKDVTY | TQYANNNDAT   | SSMSSTSKDT | GNLSTPTSDT | SI GEFTKEFG |
| CaurMrr1      | TYGFTTNMD-  | -----KDL YRS | KPYTSETLQS | NLATDSSTVP |             |
| CI_Mrr1_NCBI  | TYGFSREVND  | QLVKQQYSC    | DPVRNASNSS | ESTSTSGFSA | STDSI STDDP |
| CI_Mrr1_study | TYGFSREVND  | QLVKQQYSC    | DPVRNASNSS | ESTSTSGFSA | STDSI STDDP |
| Consistency   | 535*556863  | 1011033432   | 5332657458 | 4655644444 | 6535475635  |

|               |             |             |            |             |            |
|---------------|-------------|-------------|------------|-------------|------------|
|               | 1260        | 1270        | 1280       | 1290        | 1300       |
| CaMrr1        | LDLVNNQEI D | KI WLQMLSLK | SEEAQQQRQQ | ESQPFTSSQS  | QSQSPLTSAN |
| CdMrr1        | LDLVNNQEI D | KI WLQMLSMK | NDQAQSQRQQ | ESQSMAASQL  | QSKSPFASAH |
| CpMrr1        | LDYLNSEDI D | RI WLQMLSON | QQQSNQQLN  | YGI SQQQSQS | QSQSQEQHSQ |
| CaurMrr1      | SKSSTNSEI D | KI WLQVLSLK | HDMALAGNSQ | DARI DFKAPI | TPTTKGADNR |
| CI_Mrr1_NCBI  | TNRVTNTEVD  | KLWLQLLSMK  | HDQLFNEDYR | EAPVVMVMTG  | NGTTNKPVSQ |
| CI_Mrr1_study | TNRVTNTEVD  | KLWLQLLSMK  | HDQLFNEDYR | EAPVVMVMTG  | NGTTNKPVSQ |
| Consistency   | 553668589*  | 88**7**68   | 5775356436 | 6643334653  | 5557424365 |

|               |            |            |             |             |             |
|---------------|------------|------------|-------------|-------------|-------------|
|               | 1310       | 1320       | 1330        | 1340        | 1350        |
| CaMrr1        | QG-----    | -----YMP   | RPESRRGSYY  | GNTPFALENL  | NFDGFGG---  |
| CdMrr1        | QS-----    | -----YMP   | RPESRRGSYY  | GNSPFTLDFN  | NFDGFGG---  |
| CpMrr1        | QQPQQQSFSQ | NYSLQQSQQP | QSQSSQQRPQ  | QQQPI GNSGQ | PQRWYGI SSG |
| CaurMrr1      | DE-----    | -----SVTQD | KDMMI SDPSA | DLERFGY---  |             |
| CI_Mrr1_NCBI  | NH-----    | -----E---- | -ANAGAATTN  | DFARFGY---  |             |
| CI_Mrr1_study | NH-----    | -----E---- | -ANAGAATTN  | DFARFGY---  |             |
| Consistency   | 5300000000 | 0000000112 | 1112151211  | 1444353452  | 55438*3000  |

|               |            |                |              |            |        |
|---------------|------------|----------------|--------------|------------|--------|
|               | 1360       | 1370           | 1380         | 1390       |        |
| CaMrr1        | -----      | QSK SSNNGEADLS | SFDFFFVDL PF | DQLFTN     |        |
| CdMrr1        | -----      | QSR SSNNGEVDLS | SFDFFDL PF   | DQLFTN     |        |
| CpMrr1        | PNWQGAAFN  | SFDAPVTPGF     | VTNGGLDDI N  | SFDFFDL PL | DQVFSS |
| CaurMrr1      | -----      | -----DLEMAT    | AFDLLSEMPF   | EEMLDV     |        |
| CI_Mrr1_NCBI  | -----      | -----DMEMEN    | RYDCFSDL PF  | DQVFNF     |        |
| CI_Mrr1_study | -----      | -----DMEMEN    | RYDCFSDL PF  | DQVFNF     |        |
| Consistency   | 0000000000 | 0000000110     | 1121545446   | 58*48589*8 | 887853 |

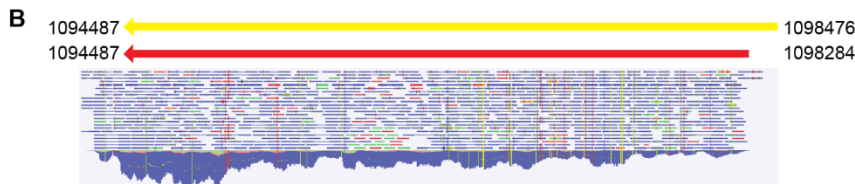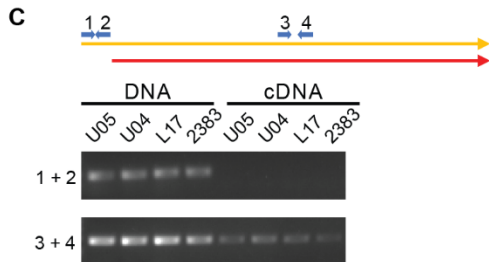

309 **Fig. S4. Reannotation of CLUG\_00542 as CIMRR1.** We propose that the start codon  
310 of *CIMRR1* is currently misannotated in NCBI based on the following evidence and  
311 utilized M65 as the start codon (M1) when notating amino acid mutations sites. (A)  
312 Amino acid sequence alignment of Mrr1 orthologs from *C. albicans* (Ca), *C. dubliniensis*  
313 (Cd), *C. parapsilosis* (Cp), *C. auris* (Caur) and *C. lusitaniae* (CIMrr1\_NCBI, from NCBI  
314 database, and CIMrr1\_study, annotated with an alternate start codon (M65) and  
315 adjusted to contain SNPs shared by all twenty sequenced isolates in this study). Amino  
316 acids are colored by sequence conservation between homologs (consistency score),  
317 with increased conservation from cool (dark blue) to warm (red) colors, calculated by  
318 PRALINE (16). There is no sequence homology between the first 64 amino acids of the  
319 CIMrr1\_NCBI sequence and that of other *Candida* species. CIMrr1 M65, the corrected  
320 start codon, is marked by a red triangle. (B) Alignment of RNA-Seq read coverage for  
321 *MRR1* from U04 (*MRR1*<sup>Y813C</sup>). Minimal reads were present to support the current start  
322 codon as annotated in NCBI (yellow arrow), whereas read coverage increases around  
323 M65 (red arrow), the proposed corrected start codon. (C) Schematic of primers to  
324 amplify *MRR1*, top, and gel image of PCR products obtained using primer set 1+2  
325 (within disputed 5' region, ED\_068 and ED\_069) and 3+4 (within gene, ED\_070 and  
326 ED\_071) with DNA or cDNA (representing transcribed mRNA sequence), bottom. No  
327 product was obtained from primers 1+2 when using a cDNA template, suggesting this  
328 fragment of DNA was not transcribed as part of the *MRR1* mRNA.

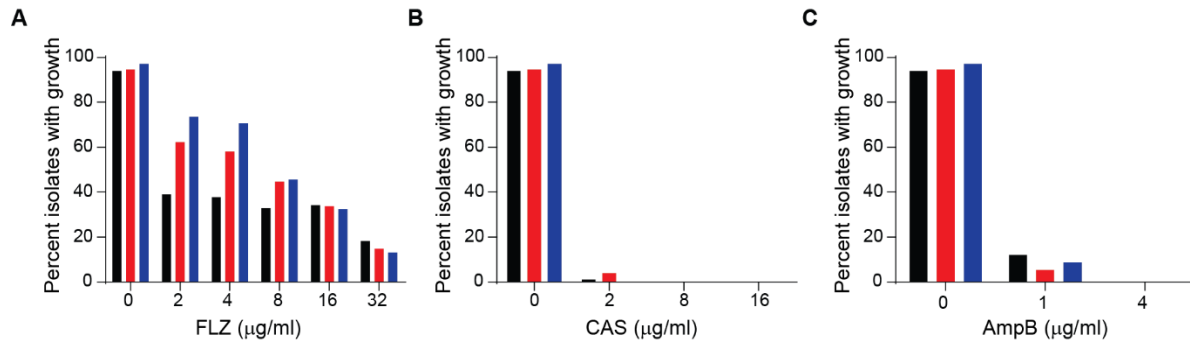

329

330 **Fig. S5. Resistance to FLZ, but not other antifungals, was heterogeneous.**

331 Percentage of Sp1 (black, n=82), UL (red, n=74), LL (blue, n=68) isolates capable of

332 growth on increasing concentrations of (A) fluconazole (FLZ), (B) caspofungin (CAS)

333 and (C) amphotericin B (AmpB). Representative data shown, growth on agar plates

334 repeated twice. Presence or absence of growth in FLZ matched what was observed for

335 FLZ MICs.

336

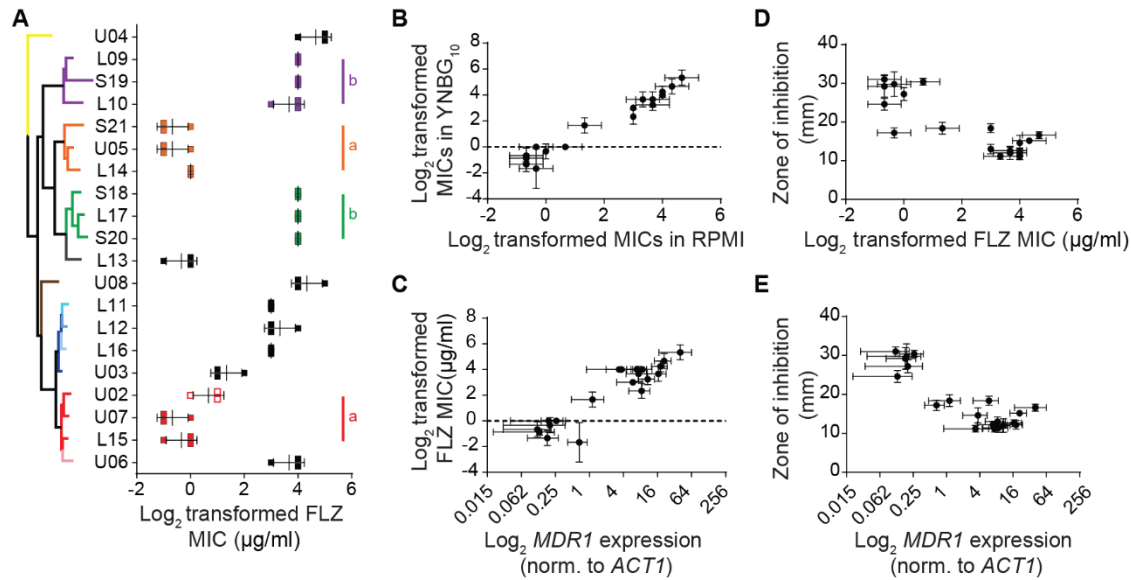

337  
 338 **Fig. S6. *MRR1* allele correlates with *MDR1* expression and FLZ and phenazine**  
 339 **resistance.** Comparisons between the twenty sequenced clinical *C. lusitaniae* isolates.  
 340 (A) Log<sub>2</sub> transformed FLZ MIC (µg/ml) measured in RPMI medium at 24 hours,  
 341 clustered by maximum-likelihood tree based on inter-isolate SNPs, left, with branches  
 342 colored by *MRR1* allele (Fig. 1C). Data points for isolates with the same *MRR1* allele  
 343 are colored the same, a-b P<0.0001. Isolate U02, which has a 6L duplication (Fig. S3B),  
 344 is represented by open symbols. (B) Comparison of log<sub>2</sub> transformed FLZ MICs (µg/ml),  
 345 measured at 24 hours, in RPMI and YNBG<sub>10</sub> media, Pearson correlation coefficient r =  
 346 0.9677, P<0.0001. (C) Comparison of Log<sub>2</sub> transformed FLZ MIC (µg/ml), measured in  
 347 YNBG<sub>10</sub> at 24 hours, to *MDR1* expression, normalized to *ACT1* levels, of cells grown in  
 348 YNBG<sub>10</sub> for 6 hours. Spearman correlation coefficient ρ = 0.8414, P<0.0001. (D and E)  
 349 Comparison of the zone of inhibition around colonies of *P. aeruginosa* strain PA14 on  
 350 individual *C. lusitaniae* lawns to log<sub>2</sub> transformed FLZ MIC (µg/ml), measured in RPMI  
 351 medium at 24 hours, Pearson correlation coefficient r = -0.7563, P<0.0001 (D), and  
 352 *MDR1* expression, Spearman correlation coefficient ρ = -0.7868, P<0.0001 (E). Mean ±  
 353 s.d. for data from three independent replicates of gene expression and FLZ MIC and  
 354 representative data from five technical replicates for the zone of inhibition (repeated  
 355 independently three times) is shown for all experiments.

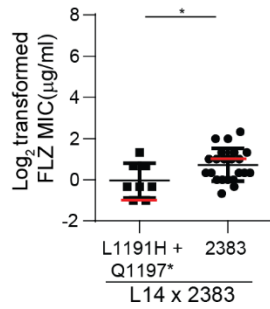

356

357

358

359

360

361

**Fig. S7. Mating does not alter FLZ MIC.** Log<sub>2</sub> transformed FLZ MICs (µg/ml) for progeny (n=30) obtained by mating the FLZ<sup>S</sup> strain 2383 (*MRR1*<sup>2383</sup>) to the FLZ<sup>S</sup> clinical isolates L14 (*chx*<sup>R</sup>, *MRR1*<sup>L1191H+Q1197\*</sup>); grouped by *MRR1* allele. Red lines indicate the mean FLZ MIC for the parental strain for each *MRR1* allele. Mean ± s.d. of data from three independent replicates is shown, \*P<0.05.



**A**

|            |                                                                     |
|------------|---------------------------------------------------------------------|
| CaMdr1     | MHYRFLRDSFVGRVTYHLSKHKYFAHPPEAKDYIVPEKYLADYKPTLADDT SINFEKEEI 60    |
| ClMdr1     | MLSKFVRESFFGRLLYHATQHKLFGYAEKPGYVIPEKYLPGNSVESTDSLD--KLK--- 55      |
| Clug_01938 | MLSKFVRESFFGRLLYHATQHKLFGYAEKPGYVIPEKYLPGNSVESTDSLD--KLK--- 55      |
| Clug_01939 | -----0                                                              |
| CaMdr1     | DNQGEPNSSQSSSSNNTIVDNNNNNDNDVDGDKIVVTWDGDDDPENPQNWP TLQKAFFIF 120   |
| ClMdr1     | ---EEPRASLSS--N----ESSEKSLKKEDDLIIVGWDGEDDPENPNWPFYKILFIF 105       |
| Clug_01938 | ---EEPRASLSS--N----ESLEKSLKKEDDLIIVGWDGEDDPENPNWPFYKILFIF 105       |
| Clug_01939 | -----0                                                              |
| CaMdr1     | QISFLTTSVYMGSVYTPGIEELMHDFGIGRVVATLPLTLFVIGYGVGPLVFSPMSENAI 180     |
| ClMdr1     | EIGILTA FVYMASAIYTPGVDEIMEKMNIQT LATLPLTMFVFGYIGPMVFSPMSENAI 165    |
| Clug_01938 | EIGILTA FVYMASAIYTPGVDEIMEKMNIQT LATLPLTMFVFGYIGPMVFSPMSENAI 165    |
| Clug_01939 | -----0                                                              |
| CaMdr1     | FGRTSIYIITLFLFVILQIPTALVNNIAGLCILRFLGGFFASPCLATGGASVADVVKFWN 240    |
| ClMdr1     | FGRTSIYIITLFIFFILQIPTALVTDITSLCVLRFIAGFFASPCLATGGASVGDVTAMPY 225    |
| Clug_01938 | FGRTSIYIITLFIFFILQIPTALVTDITSLCVLRFIAGFFASPCLATGGASVGDVTAMPY 225    |
| Clug_01939 | -----0                                                              |
| CaMdr1     | LPVGLAAWSLGA VCGPSFGPFFGSI LTVKASWRWTFWFCIISGFSFVMLCFTLPETFGK 300   |
| ClMdr1     | IPVSI SAWSIAAVCAPSMGPLFGSILVVKGN YHWTWFVFCITSGCAFLVLSWFLPESY GK 285 |
| Clug_01938 | IPVSI SAWSIAAVCAPSMGPLFGSILVVKGN YHWTWFVFCITSGCAFLVLSWFLPESY RE 285 |
| Clug_01939 | -----0                                                              |
| CaMdr1     | TLLYRKAKRLRAITGNDRITSEGEVENS KMTSHELIDTLWRPLEITVMEPVLLINIYI 360     |
| ClMdr1     | TILYRKAERLRKLTGNDKITSEGHIE NSKMEVHEMAVDILWRPFELIFEPVLLINIYI 345     |
| Clug_01938 | DHLVQKSREIEKVDWQR-----302                                           |
| Clug_01939 | -----0                                                              |
| CaMdr1     | AMVYSILYLFFEVPFIYFVGKHF TLVELGTTYMSIVIGIVIAAFIYIPVIRQKFTKPI L 420   |
| ClMdr1     | GLVYSIMYTWF EAFPIV FLEIHHFTLIEMGVSYVALMIGIMIGAAFFIPFIYRRFTKLL 405   |
| Clug_01938 | -----302                                                            |
| Clug_01939 | -----MGVSYVALMIGIMIGAAFFIPFIYRRFTKLL 32                             |
| CaMdr1     | RQEQVFPEVFIPIAIVGGILLTSGLFIFGWSANRTHWVGPLFGAATTASGAFLIFQTLF 480     |
| ClMdr1     | VGEQVQPEVFLPMTILGSI LMPIGIFIFGWT SAPDIHWIAPMIGTAVFAAGAFIVFQTLF 465  |
| Clug_01938 | -----302                                                            |
| Clug_01939 | VGEQVQPEVFLPMTILGSI LMPIGIFIFGWT SAPDIHWIAPMIGTAVFAAGAFIVFQTLF 92   |
| CaMdr1     | NFMGASF KPHYIASVFASNDLFRSVIASVFPLFGAPLFDNLATPEYPVAVGSSVLGFITL 540   |
| ClMdr1     | NYLSMSFW-RYLASVFAGNDLFRS IMAGAFPLFGRALFINLKNERFRVWGSTVLACL CV 524   |
| Clug_01938 | -----302                                                            |
| Clug_01939 | NYLSMSFW-RYLASVFAGNDLFRS IMAGAFPLFGRALFINLKNERFRVWGSTVLACL CV 151   |
| CaMdr1     | VMIAIPVLFYLN GPKL RARSKYAN- 564                                     |
| ClMdr1     | VMVAIPVLFYLN GPKL RARSKYS GF 549                                    |
| Clug_01938 | -----302                                                            |
| Clug_01939 | VMVAIPVLFYLN GPKL RARSKYS GF 176                                    |

**B**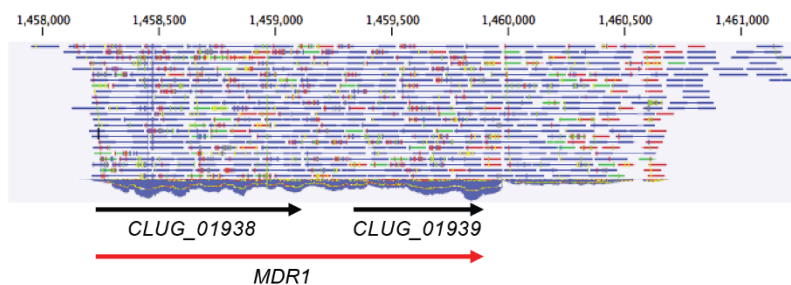

363 **Fig. S8. Reannotation of *CLUG\_01938/01939* as *CIMDR1*.** We propose that *MDR1* is  
364 misannotated in NCBI as two genes, *CLUG\_01938* and *CLUG\_01939*, based on the  
365 following evidence. (A) Alignment, using Clustal Omega, of amino acid sequences for  
366 *Mdr1* from *C. albicans* (Ca, first) and *C. lusitaniae* (Cl) including our proposed  
367 reannotation of *CIMdr1* (second) and *Clug\_01938* (third) and *Clug\_01939* (fourth) from  
368 NCBI. Blue arrows indicate the location of two codons effected by single nucleotide  
369 insertions in the ATCC 42720 reference genome available from NCBI which were not  
370 present in our resequencing of ATCC 42720 or any of the clinical isolates. Deletion of  
371 these nucleotides from the sequence caused a frameshift, elongating the open reading  
372 frame of *CLUG\_01938* to include *CLUG\_01939*. (B) Read coverage plot for *MDR1* from  
373 RNA-Seq data, showing the positions of *CLUG\_01938/01939*, black arrows, compared  
374 to the proposed corrected *MDR1* sequence, red arrow. Reads are present throughout  
375 this entire region, suggesting a continuous transcript rather than two independent  
376 transcripts.  
377

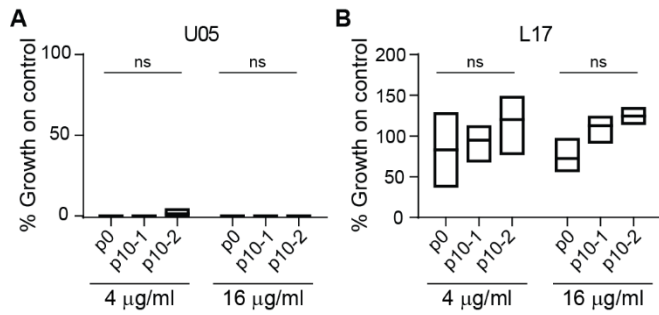

378

379 **Fig. S9. FLZ resistance profiles are stable following *in vitro* evolution.** In duplicate,

380 the (A) FLZ<sup>S</sup> U05 (*MRR1*<sup>L1191H+Q1197\*</sup>) and (B) FLZ<sup>R</sup> L17 (*MRR1*<sup>H467L</sup>) isolates were

381 passed 10 times in YNBG<sub>10</sub>, accumulating 40+ generations. CFUs for the parental

382 isolate, p0, and evolved isolates, p10, were enumerated (in triplicate) in the

383 presence/absence of either 4 or 16 µg/ml FLZ. Growth on FLZ was normalized to

384 growth on the vehicle only control. ns = not significant.

385

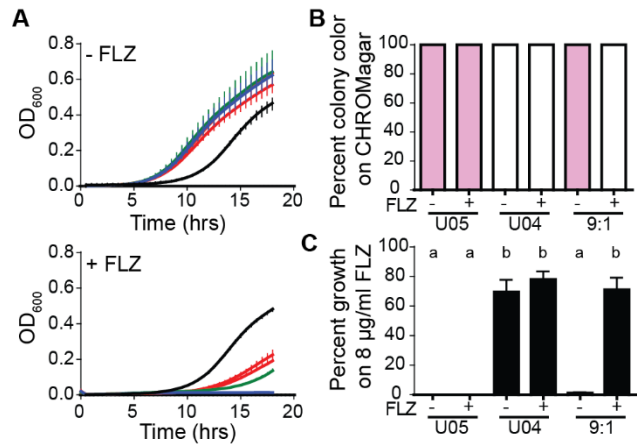

386

387 **Figure S10. FLZ<sup>R</sup> subpopulations overtake the population following FLZ**  
 388 **exposure.** (A) Growth in the absence (-) and presence (+) of 4 µg/ml FLZ in RPMI over  
 389 18 hours. Mean ± s.d. of three technical replicates is shown for FLZ<sup>R</sup> U04 (*MRR1*<sup>Y813C</sup>,  
 390 black), FLZ<sup>S</sup> U05 (*MRR1*<sup>L1191H+Q1197\*</sup>, blue), a 9:1 mixture of U05:U04 (green) and two  
 391 replicates of a complex mixture of all UL isolates (n=72, red). Similar results were seen  
 392 by MIC analysis, see Fig. 4D. (B) Comparison of colony color on CHROMagar *Candida*  
 393 medium. Following the kinetic assay described in Fig. S10A, cultures were plated on  
 394 YPD. 10-20 colonies were patched on CHROMagar *Candida* medium and incubated at  
 395 30 °C for 48 hours. Bar color, pink (U05) and white (U04), represent colony color on  
 396 CHROMagar *Candida* medium at 48 hours. (C) CFUs were enumerated on YPD +/- 8  
 397 µg/ml FLZ plates, after growth as described in Fig. S10A. The CFUs on 8 µg/ml FLZ are  
 398 plotted as a percent of total CFUs on YPD alone. Mean ± s.d. of three technical  
 399 replicates is shown, similar results observed on three independent days, a-b, P<0.0001.

400 **Table S1.** Differentially expressed genes between FLZ<sup>S</sup> and FLZ<sup>R</sup> clinical isolates.

| Gene               | logFC | logCPM | PValue  | <i>C. albicans</i><br>ortholog | Annotated features                                                                                                                                                                                                                          |
|--------------------|-------|--------|---------|--------------------------------|---------------------------------------------------------------------------------------------------------------------------------------------------------------------------------------------------------------------------------------------|
| <i>CLUG_02157</i>  | 9.1   | 9.6    | 3.6E-27 |                                | Has domain(s) with predicted zinc ion binding, nucleotide binding, oxidoreductase activity and role in oxidation-reduction process                                                                                                          |
| <i>CLUG_02156</i>  | 8.6   | 10.7   | 2.8E-25 |                                | Protein of unknown function                                                                                                                                                                                                                 |
| <i>CLUG_02858</i>  | 6.7   | 6.7    | 2.9E-05 | <i>CHA1</i>                    | Ortholog(s) have role in filamentous growth                                                                                                                                                                                                 |
| <i>CLUG_01938*</i> | 6.6   | 8.7    | 2.1E-22 | <i>MDR1</i>                    | Ortholog(s) have fluconazole transporter, drug transmembrane transporter activity, role in fluconazole transport, drug transmembrane transport, drug export, cellular response to drug, pathogenesis, cellular response to oxidative stress |
| <i>CLUG_01939*</i> | 6.5   | 8.2    | 1.4E-20 |                                | Protein of unknown function                                                                                                                                                                                                                 |
| <i>CLUG_03199</i>  | 3.9   | 8.4    | 5.0E-13 |                                | Has domain(s) with predicted nucleotide binding, zinc ion binding, oxidoreductase activity and role in oxidation-reduction process                                                                                                          |
| <i>CLUG_04991</i>  | 3.9   | 5.3    | 1.5E-16 |                                | Has domain(s) with predicted catalytic, coenzyme binding, nucleotide binding activity and role in cellular metabolic process                                                                                                                |
| <i>CLUG_03198</i>  | 3.6   | 4.2    | 1.1E-16 |                                | Has domain(s) with predicted zinc ion binding, nucleotide binding, oxidoreductase activity and role in oxidation-reduction process                                                                                                          |
| <i>CLUG_01281</i>  | 3.4   | 10.7   | 4.0E-09 |                                | Has domain(s) with predicted catalytic, coenzyme binding, nucleotide binding activity and role in cellular metabolic process                                                                                                                |
| <i>CLUG_01282</i>  | 3.3   | 8.5    | 8.6E-12 |                                | Has domain(s) with predicted FMN binding, electron carrier, oxidoreductase activity                                                                                                                                                         |
| <i>CLUG_05005</i>  | 2.6   | 7.3    | 4.8E-12 |                                | Has domain(s) with predicted hydrolase activity                                                                                                                                                                                             |
| <i>CLUG_02968</i>  | 2.5   | 9.9    | 1.8E-11 | <i>orf19.7306</i>              | Protein of unknown function                                                                                                                                                                                                                 |
| <i>CLUG_00507</i>  | 2.5   | 1.4    | 1.6E-04 | <i>GIT1</i>                    | Ortholog(s) have glycerophosphodiester transmembrane transporter activity and role in glycerophosphodiester transport                                                                                                                       |
| <i>CLUG_04429</i>  | 1.7   | 7.5    | 1.0E-10 |                                | Protein of unknown function                                                                                                                                                                                                                 |
| <i>CLUG_05825</i>  | 1.6   | 6.7    | 3.2E-07 | <i>FLU1</i>                    | Ortholog(s) have drug transmembrane transporter activity, role in drug transmembrane transport, cellular response to biotic stimulus, peptide transport, spermidine transport, fluconazole transport and plasma membrane localization       |
| <i>CLUG_01393</i>  | 1.6   | 5.3    | 6.5E-07 |                                | Has domain(s) with predicted catalytic, coenzyme binding, nucleotide binding activity and role in cellular metabolic process                                                                                                                |
| <i>CLUG_03295</i>  | 1.3   | 4.7    | 6.4E-05 | <i>PTH2</i>                    | Protein of unknown function                                                                                                                                                                                                                 |
| <i>CLUG_03201</i>  | -1.1  | 5.4    | 9.1E-05 |                                | Protein of unknown function                                                                                                                                                                                                                 |
| <i>CLUG_02758</i>  | -1.4  | 4.7    | 3.3E-05 | <i>OPT2</i>                    | Ortholog(s) have oligopeptide transmembrane transporter activity and role in nitrogen utilization, oligopeptide transmembrane transport                                                                                                     |
| <i>CLUG_05131</i>  | -1.9  | 8.2    | 7.4E-09 | <i>PEX5</i>                    | Ortholog(s) have role in fatty acid beta-                                                                                                                                                                                                   |

oxidation, protein import into peroxisome matrix

401  
402 \**CLUG\_01938* and *CLUG\_01939* are misannotated and represent one gene, see Fig. S8  
403  
404

405 **Table S2.** Strains used in this study.

| Strain                      | Lab #  | Relevant genotype                                          | Parental isolate | Source                                      |
|-----------------------------|--------|------------------------------------------------------------|------------------|---------------------------------------------|
| <b><i>C. lusitaniae</i></b> |        |                                                            |                  |                                             |
| U02                         | DH3097 | MAT $\alpha$ ,<br><i>MRR1</i> <sup>Y1126N+P1174P(tr)</sup> |                  | Dartmouth Hitchcock Medical Center          |
| U03                         | DH3096 | MAT $\alpha$ , <i>MRR1</i> <sup>R1066S+A550V</sup>         |                  | Dartmouth Hitchcock Medical Center          |
| U04 (A04)                   | DH2949 | MAT $\alpha$ , <i>MRR1</i> <sup>Y813C</sup>                |                  | Dartmouth Hitchcock Medical Center and (23) |
| U05                         | DH3087 | MAT $\alpha$ ,<br><i>MRR1</i> <sup>L1191H+Q1197*</sup>     |                  | Dartmouth Hitchcock Medical Center          |
| U06                         | DH3100 | MAT $\alpha$ , <i>MRR1</i> <sup>Y1126N+S359*</sup>         |                  | Dartmouth Hitchcock Medical Center          |
| U07                         | DH3098 | MAT $\alpha$ ,<br><i>MRR1</i> <sup>Y1126N+P1174P(tr)</sup> |                  | Dartmouth Hitchcock Medical Center          |
| U08                         | DH3105 | MAT $\alpha$ , <i>MRR1</i> <sup>E722K</sup>                |                  | Dartmouth Hitchcock Medical Center          |
| L09                         | DH3090 | MAT $\alpha$ , <i>MRR1</i> <sup>Y813N</sup>                |                  | Dartmouth Hitchcock Medical Center          |
| L10                         | DH3091 | MAT $\alpha$ , <i>MRR1</i> <sup>Y813N</sup>                |                  | Dartmouth Hitchcock Medical Center          |
| L11                         | DH3093 | MAT $\alpha$ ,<br><i>MRR1</i> <sup>R1066S+K912N(tr)</sup>  |                  | Dartmouth Hitchcock Medical Center          |
| L12                         | DH3094 | MAT $\alpha$ ,<br><i>MRR1</i> <sup>R1066S+Y1061*</sup>     |                  | Dartmouth Hitchcock Medical Center          |
| L13                         | DH3104 | MAT $\alpha$ , <i>MRR1</i> <sup>I599T</sup>                |                  | Dartmouth Hitchcock Medical Center          |
| L14                         | DH3088 | MAT $\alpha$ ,<br><i>MRR1</i> <sup>L1191H+Q1197*</sup>     |                  | Dartmouth Hitchcock Medical Center          |
| L15                         | DH3099 | MAT $\alpha$ ,<br><i>MRR1</i> <sup>Y1126N+P1174P(tr)</sup> |                  | Dartmouth Hitchcock Medical Center          |
| L16                         | DH3095 | MAT $\alpha$ ,<br><i>MRR1</i> <sup>R1066S+G1231*</sup>     |                  | Dartmouth Hitchcock Medical Center          |
| L17                         | DH3101 | MAT $\alpha$ , <i>MRR1</i> <sup>H467L</sup>                |                  | Dartmouth Hitchcock Medical Center          |
| S18                         | DH3102 | MAT $\alpha$ , <i>MRR1</i> <sup>H467L</sup>                |                  | Dartmouth Hitchcock Medical Center          |
| S19                         | DH3092 | MAT $\alpha$ , <i>MRR1</i> <sup>Y813N</sup>                |                  | Dartmouth Hitchcock Medical Center          |
| S20                         | DH3103 | MAT $\alpha$ , <i>MRR1</i> <sup>H467L</sup>                |                  | Dartmouth Hitchcock Medical Center          |
| S21                         | DH3089 | MAT $\alpha$ ,                                             |                  | Dartmouth Hitchcock                         |

|                             |                           |                                                                       |      |                |
|-----------------------------|---------------------------|-----------------------------------------------------------------------|------|----------------|
|                             |                           | <i>MRR1</i> <sup>L1191H+Q1197*</sup>                                  |      | Medical Center |
| U04 chx <sup>R</sup>        | DH3106                    | chx <sup>R</sup> , MATα, <i>MRR1</i> <sup>Y813C</sup>                 | U04  | This study     |
| L17 chx <sup>R</sup>        | DH3107                    | chx <sup>R</sup> , MATα, <i>MRR1</i> <sup>H467L</sup>                 | L17  | This study     |
| L14 chx <sup>R</sup>        | DH3108                    | chx <sup>R</sup> , MATα,<br><i>MRR1</i> <sup>L1191H+Q1197*</sup>      | L14  | This study     |
| U04 <i>mrr1</i> Δ<br>#4     | DH3306                    | MATα, <i>mrr1</i> Δ:NAT1                                              | U04  | This study     |
| U04 <i>mrr1</i> Δ<br>#5     | DH3307                    | MATα, <i>mrr1</i> Δ:NAT1                                              | U04  | This study     |
| U04 <i>mdr1</i> Δ           | DH3112                    | MATα, <i>MRR1</i> <sup>Y813C</sup> ,<br><i>mdr1</i> Δ:NAT1            | U04  | This study     |
| U05 <i>mdr1</i> Δ           | DH3114                    | MATα,<br><i>MRR1</i> <sup>L1191H+Q1197*</sup> ,<br><i>mdr1</i> Δ:NAT1 | U05  | This study     |
| ATCC<br>42720               | DH2387                    | MATα                                                                  |      | (4)            |
| 2383                        | DH2383<br>(RSY284/CL6936) | MATα, <i>ura3</i> Δ                                                   |      | (26)           |
| <b><i>P. aeruginosa</i></b> |                           |                                                                       |      |                |
| PA14                        | DH122                     | Wild type                                                             |      | (27)           |
| Δ <i>phz</i>                | DH933                     | PA14 with deletion of<br><i>phzA1-G1</i> and <i>phzA2-G2</i> operons  | PA14 | (28)           |

406

407

**Table S3.** Primers used in this study.

| <b>Name</b> | <b>Description</b>                                                       | <b>Sequence</b>                                           |
|-------------|--------------------------------------------------------------------------|-----------------------------------------------------------|
| AB001       | Forward to make left flank of knockout construct for <i>MRR1</i>         | AAG GCG TGT CCT TCA TGT T                                 |
| AB003       | Reverse to make left flank of knockout construct for <i>MRR1</i>         | AACGTCGTGACTGGGAAAAAT<br>CATTAGCT TCG CTG GAA TTT CTG TTT |
| AB004       | Forward to make right flank of knockout construct for <i>MRR1</i>        | TAT CCG CTC ACA ATT CCA CTG<br>CTC GGT TCT GGT TCT ATA TG |
| AB006       | Reverse to make right flank of knockout construct for <i>MRR1</i>        | GAG TAC GTG GAT CTC TAC TTG ATG                           |
| AB007       | Nested forward to amplify across stitched <i>MRR1</i> knockout construct | CTTTGCTTGTTTGGGAAACCTC                                    |
| AB008       | Nested reverse to amplify across stitched <i>MRR1</i> knockout construct | TTTCCGGGTTCAATGCCA                                        |
| AB009       | Forward to amplify <i>NAT1</i> for <i>MRR1</i> knockout construct        | AAACAGAAATTCCAGCGAAGCTA<br>ATGATTTTTCCAGTCACGACGTT        |
| AB010       | Reverse to amplify <i>NAT1</i> for <i>MRR1</i> knockout construct        | CATATAGAACCAGAACCGAGCAG<br>TGGAATTGTGAGCGGATA             |
| ED038       | Forward to make left flank of knockout construct for <i>MDR1</i>         | CAGTAGTGTGTTTCGTCTCCTTAG                                  |
| ED039       | Reverse to make left flank of knockout construct for <i>MDR1</i>         | AACGTCGTGACTGGGAAAAATCATT<br>GCGATTAGGTATTAGATGGATGTTTG   |
| ED042       | Nested forward to amplify across stitched <i>MDR1</i> knockout construct | CGGCGGAGTTATATCCGTTTC                                     |
| ED043       | Nested reverse to amplify across stitched <i>MDR1</i> knockout construct | GGCTTCCGTATTTAAGCTGTACT                                   |
| ED044       | Forward to amplify <i>NAT1</i> for <i>MDR1</i> knockout construct        | CAAACATCCATCTAATACCTAAT<br>CGCTAATGATTTTTCCAGTCACGACGTT   |
| ED046       | Forward to amplify right flank of <i>MDR1</i> knockout construct         | TAT CCG CTC ACA ATT CCA C GAG<br>TTCACAAGGTAATTGTTTCAGG   |
| ED048       | Reverse to amplify right flank of <i>MDR1</i> knockout construct         | CCGACCCTCCCATTCAATC                                       |
| ED049       | Reverse to amplify <i>NAT1</i> for <i>MDR1</i> knockout construct        | CCTGAACAATTACCTTGTGAACT<br>CGTGGAAATTGTGAGCGGATA          |
| ED050       | Forward upstream of <i>MRR1</i> to amplify for sequencing                | GTGAACACAATACAATTGAAGAGAAGTC                              |
| ED051       | Reverse downstream of <i>MRR1</i> to amplify for sequencing              | GCATCTCCTAATTCGATATTTTCATGACT                             |
| ED052       | Sequencing primer for <i>MRR1</i> – region 1                             | CTGGCTTTGAGCGGCCGGC                                       |
| ED053       | Sequencing primer for <i>MRR1</i> – region 2                             | GGATTTCTTGATTGGCG                                         |
| ED054       | Sequencing primer for <i>MRR1</i> – region 3                             | CAGACGTTGAACCAATC                                         |
| ED055       | Sequencing primer for <i>MRR1</i> – region 4                             | CTTGAAGTGCAGAGTATC                                        |
| ED056       | Sequencing primer for <i>MRR1</i> – region 5                             | GCAATACTTGACATACTTCC                                      |
| ED057       | Sequencing primer for <i>MRR1</i> – region 6                             | GTAAGTATTCTATCTCCACC                                      |
| ED058       | Forward for RT-PCR of <i>MDR1</i>                                        | TCCATCCATGGGTCCATTATTC                                    |
| ED059       | Reverse for RT-PCR of <i>MDR1</i>                                        | CTCAACACAAGGAAAGCACATC                                    |
| ED060       | Forward for RT-PCR of <i>ACT1</i>                                        | GGTAGAGACTTGACCGACTACTT                                   |
| ED061       | Reverse for RT-PCR of <i>ACT1</i>                                        | CCTTGATGTCACGGACGATTT                                     |
| ED062       | Forward for identification of the SNP                                    | GAAACTACTCCTCTCTCCT                                       |



|                      |                                                                                 |                          |
|----------------------|---------------------------------------------------------------------------------|--------------------------|
|                      | causing Mrr1-H467L in progeny                                                   |                          |
| ED063                | Reverse for identification of the SNP causing Mrr1-H467L in progeny             | GGAAGTATGTCAAGTATTGC     |
| ED064                | Forward for the identification of the SNP causing Mrr1-L1191H+Q1197* in progeny | GGACGAGGAATACTTTAGGC     |
| ED065                | Reverse for the identification of the SNP causing Mrr1-L1191H+Q1197* in progeny | GCTAATCATGCTTCATCGAAT    |
| ED066                | Forward for the identification of the SNP causing Mrr1-Y813C in progeny         | GATCCAAAGCAGGCAGC        |
| ED067                | Reverse for the identification of the SNP causing Mrr1-Y813C in progeny         | CCAGGCAAGATGAAGATCTG     |
| ED068                | Forward for the validation of the annotated 5' region of <i>MRR1</i>            | CGATTTGCCCAAATGCAGTATATC |
| ED069                | Reverse for the validation of the annotated 5' region of <i>MRR1</i>            | GGAGTTGAAGCACGGAGAAA     |
| ED070                | Forward internal primers for <i>MRR1</i> , paired with ED068-69                 | GACGAGGAATACTTTAGGC      |
| ED071                | Reverse internal primers for <i>MRR1</i> , paired with ED068-69                 | GCAAGATTTGCTCGTTTAGC     |
| <i>MDR1</i><br>crRNA | crRNA for <i>MDR1</i>                                                           | AGTCCTTGCTTGGCCACAGG     |
| <i>MRR1</i><br>crRNA | crRNA for <i>MRR1</i>                                                           | TTCATCACTAAAGATGATGG     |

409

410 **Dataset S1.** Positions and predicted effects of biallelic SNPs.

411 **Dataset S2.** Positions and predicted effects of INDELS.

412 **References**

- 413 1. Hogan DA, *et al.* (2016) Analysis of lung microbiota in bronchoalveolar lavage,  
414 protected brush and sputum samples from subjects with mild-to-moderate cystic  
415 fibrosis lung disease. *PLoS One* 11(3):e0149998.
- 416 2. Willger SD, *et al.* (2014) Characterization and quantification of the fungal  
417 microbiome in serial samples from individuals with cystic fibrosis. *Microbiome*  
418 2:40.
- 419 3. Altschul SF, *et al.* (1990) Basic local alignment search tool. *J. Mol. Biol.*  
420 215(3):403-410.
- 421 4. Butler G, *et al.* (2009) Evolution of pathogenicity and sexual reproduction in eight  
422 *Candida* genomes. *Nature* 459(7247):657-662.
- 423 5. Li H & Durbin R (2009) Fast and accurate short read alignment with Burrows-  
424 Wheeler transform. *Bioinformatics* 25(14):1754-1760.
- 425 6. Van der Auwera GA, *et al.* (2013) From FastQ data to high confidence variant  
426 calls: the Genome Analysis Toolkit best practices pipeline. *Curr Protoc*  
427 *Bioinformatics* 43:11 10 11-33.
- 428 7. Cingolani P, *et al.* (2012) A program for annotating and predicting the effects of  
429 single nucleotide polymorphisms, SnpEff: SNPs in the genome of *Drosophila*  
430 *melanogaster* strain w1118; iso-2; iso-3. *Fly (Austin)* 6(2):80-92.
- 431 8. Bankevich A, *et al.* (2012) SPAdes: a new genome assembly algorithm and its  
432 applications to single-cell sequencing. *J Comput Biol* 19(5):455-477.
- 433 9. Schubert M, Lindgreen S, & Orlando L (2016) AdapterRemoval v2: rapid adapter  
434 trimming, identification, and read merging. *BMC Res Notes* 9:88.
- 435 10. Joshi N & Fass J (2011) Sickle: A sliding-window, adaptive, quality-based  
436 trimming tool for FastQ files (Version 1.33) [Software] Available at  
437 <https://github.com/najoshi/sickle>.
- 438 11. Nguyen LT, Schmidt HA, von Haeseler A, & Minh BQ (2015) IQ-TREE: a fast and  
439 effective stochastic algorithm for estimating maximum-likelihood phylogenies.  
440 *Mol. Biol. Evol.* 32(1):268-274.
- 441 12. Pedersen BS & Quinlan AR (2017) mosdepth: quick coverage calculation for  
442 genomes and exomes. *Bioinformatics*.
- 443 13. Wickham H (2009) *ggplot2: elegant graphics for data analysis* (Springer-Verlag,  
444 New York).
- 445 14. Zhao S, Guo Y, Sheng Q, & Shyr Y (2014) Advanced heat map and clustering  
446 analysis using heatmap3. *Biomed Res Int* 2014:986048.
- 447 15. R Core Team (2016) R: A language and environment for statistical computing R  
448 Foundation for Statistical Computing, Vienna, Austria, [www.R-project.org](http://www.R-project.org).
- 449 16. Simossis VA & Heringa J (2005) PRALINE: a multiple sequence alignment  
450 toolbox that integrates homology-extended and secondary structure information.  
451 *Nucleic Acids Res* 33(Web Server issue):W289-294.
- 452 17. Sievers F, *et al.* (2011) Fast, scalable generation of high-quality protein multiple  
453 sequence alignments using Clustal Omega. *Mol Syst Biol* 7:539.
- 454 18. Wu TD, *et al.* (2016) GMAP and GSNAP for Genomic Sequence Alignment:  
455 Enhancements to Speed, Accuracy, and Functionality. *Methods Mol. Biol.*  
456 1418:283-334.

- 457 19. Liao Y, Smyth GK, & Shi W (2014) featureCounts: an efficient general purpose  
458 program for assigning sequence reads to genomic features. *Bioinformatics*  
459 30(7):923-930.
- 460 20. Robinson MD, McCarthy DJ, & Smyth GK (2010) edgeR: a Bioconductor  
461 package for differential expression analysis of digital gene expression data.  
462 *Bioinformatics* 26(1):139-140.
- 463 21. CLSI (2012) *Reference method for broth dilution antifungal susceptibility testing*  
464 *of yeasts* (Wayne: Clinical and Laboratory Standard Institute).
- 465 22. Young LY, Lorenz MC, & Heitman J (2000) A *STE12* homolog is required for  
466 mating but dispensable for filamentation in *Candida lusitanae*. *Genetics*  
467 155(1):17-29.
- 468 23. Grahl N, Demers EG, Crocker AW, & Hogan DA (2017) Use of RNA-protein  
469 complexes for genome editing in non-*albicans* *Candida* species. *mSphere* 2(3).
- 470 24. Hampe IAI, Friedman J, Edgerton M, & Morschhauser J (2017) An acquired  
471 mechanism of antifungal drug resistance simultaneously enables *Candida*  
472 *albicans* to escape from intrinsic host defenses. *PLoS Pathog* 13(9):e1006655.
- 473 25. Kapoor S, *et al.* (2015) Regional centromeres in the yeast *Candida lusitanae*  
474 lack pericentromeric heterochromatin. *Proc Natl Acad Sci U S A* 112(39):12139-  
475 12144.
- 476 26. Francois F, Chapeland-Leclerc F, Villard J, & Noel T (2004) Development of an  
477 integrative transformation system for the opportunistic pathogenic yeast *Candida*  
478 *lusitanae* using *URA3* as a selection marker. *Yeast* 21(2):95-106.
- 479 27. Rahme LG, *et al.* (1995) Common virulence factors for bacterial pathogenicity in  
480 plants and animals. *Science* 268(5219):1899-1902.
- 481 28. Dietrich LE, *et al.* (2006) The phenazine pyocyanin is a terminal signalling factor  
482 in the quorum sensing network of *Pseudomonas aeruginosa*. *Mol Microbiol*  
483 61(5):1308-1321.
- 484
